# Supplementary material
Source: PubMed Central journal article supplement (PMC4036456)

**Article title: Glycan side-reaction may compromise ETD-based glycopeptide identification**

**Journal name:** Journal of The American Society for Mass Spectrometry

**Authors:** Zsuzsanna Darula and Katalin F. Medzihradszky

**Corresponding author:** Zsuzsanna Darula

Laboratory of Proteomics Research; Institute of Biochemistry, Biological Research Centre

62 Temesvari krt. Szeged, Hungary H-6726;

[darula.zsuzsanna@brc.mta.hu](mailto:darula.zsuzsanna@brc.mta.hu)

**Tris-modified monosialo-glycoforms of **VLGFKPKPPKN\*ESLETYPLMMK**, [183-204] of sodium/potassium-transporting ATPase subunit beta-1 (Uniprot ID: P14094)**

| m/z       | z | MH exp    | glycan                 | cal MH    | ppm |
|-----------|---|-----------|------------------------|-----------|-----|
| 1015.8666 | 5 | 5075.3017 | HexNAc5Hex6FucSA+TRIS  | 5075.3018 | 0   |
| 1045.0820 | 5 | 5221.3787 | HexNAc5Hex6Fuc2SA+TRIS | 5221.3597 | -4  |
| 1056.4827 | 5 | 5278.3822 | HexNAc6Hex6FucSA+TRIS  | 5278.3812 | 0   |
| 1074.2936 | 5 | 5367.4367 | HexNAc5Hex6Fuc3SA+TRIS | 5367.4176 | -4  |
| 1085.6981 | 5 | 5424.4592 | HexNAc6Hex6Fuc2SA+TRIS | 5424.4391 | -4  |
| 1088.8980 | 5 | 5440.4587 | HexNAc6Hex7FucSA+TRIS  | 5440.4340 | -5  |
| 1097.1031 | 5 | 5481.4842 | HexNAc7Hex6FucSA+TRIS  | 5481.4606 | -4  |
| 1114.9091 | 5 | 5570.5142 | HexNAc6Hex6Fuc3SA+TRIS | 5570.4970 | -3  |
| 1118.1090 | 5 | 5586.5137 | HexNAc6Hex7Fuc2SA+TRIS | 5586.4919 | -4  |
| 1126.3125 | 5 | 5627.5312 | HexNAc7Hex6Fuc2SA+TRIS | 5627.5185 | -2  |
| 1147.3201 | 5 | 5732.5692 | HexNAc6Hex7Fuc3SA+TRIS | 5732.5498 | -3  |

All these glycoforms were also detected without the glycan modification

Peak assignment is only given for the first spectrum

In all spectra

4+ ions representing the modified SA loss are labeled with **X**;

3+ ions representing the modified SA loss are labeled with **X**

V20100910-12 #5797 RT: 45.39 AV: 1 NL: 3.72E3  
F: ITMS + c NSI d w sa Full ms2 1015.87@etd40.00 [50.00-2000.00]

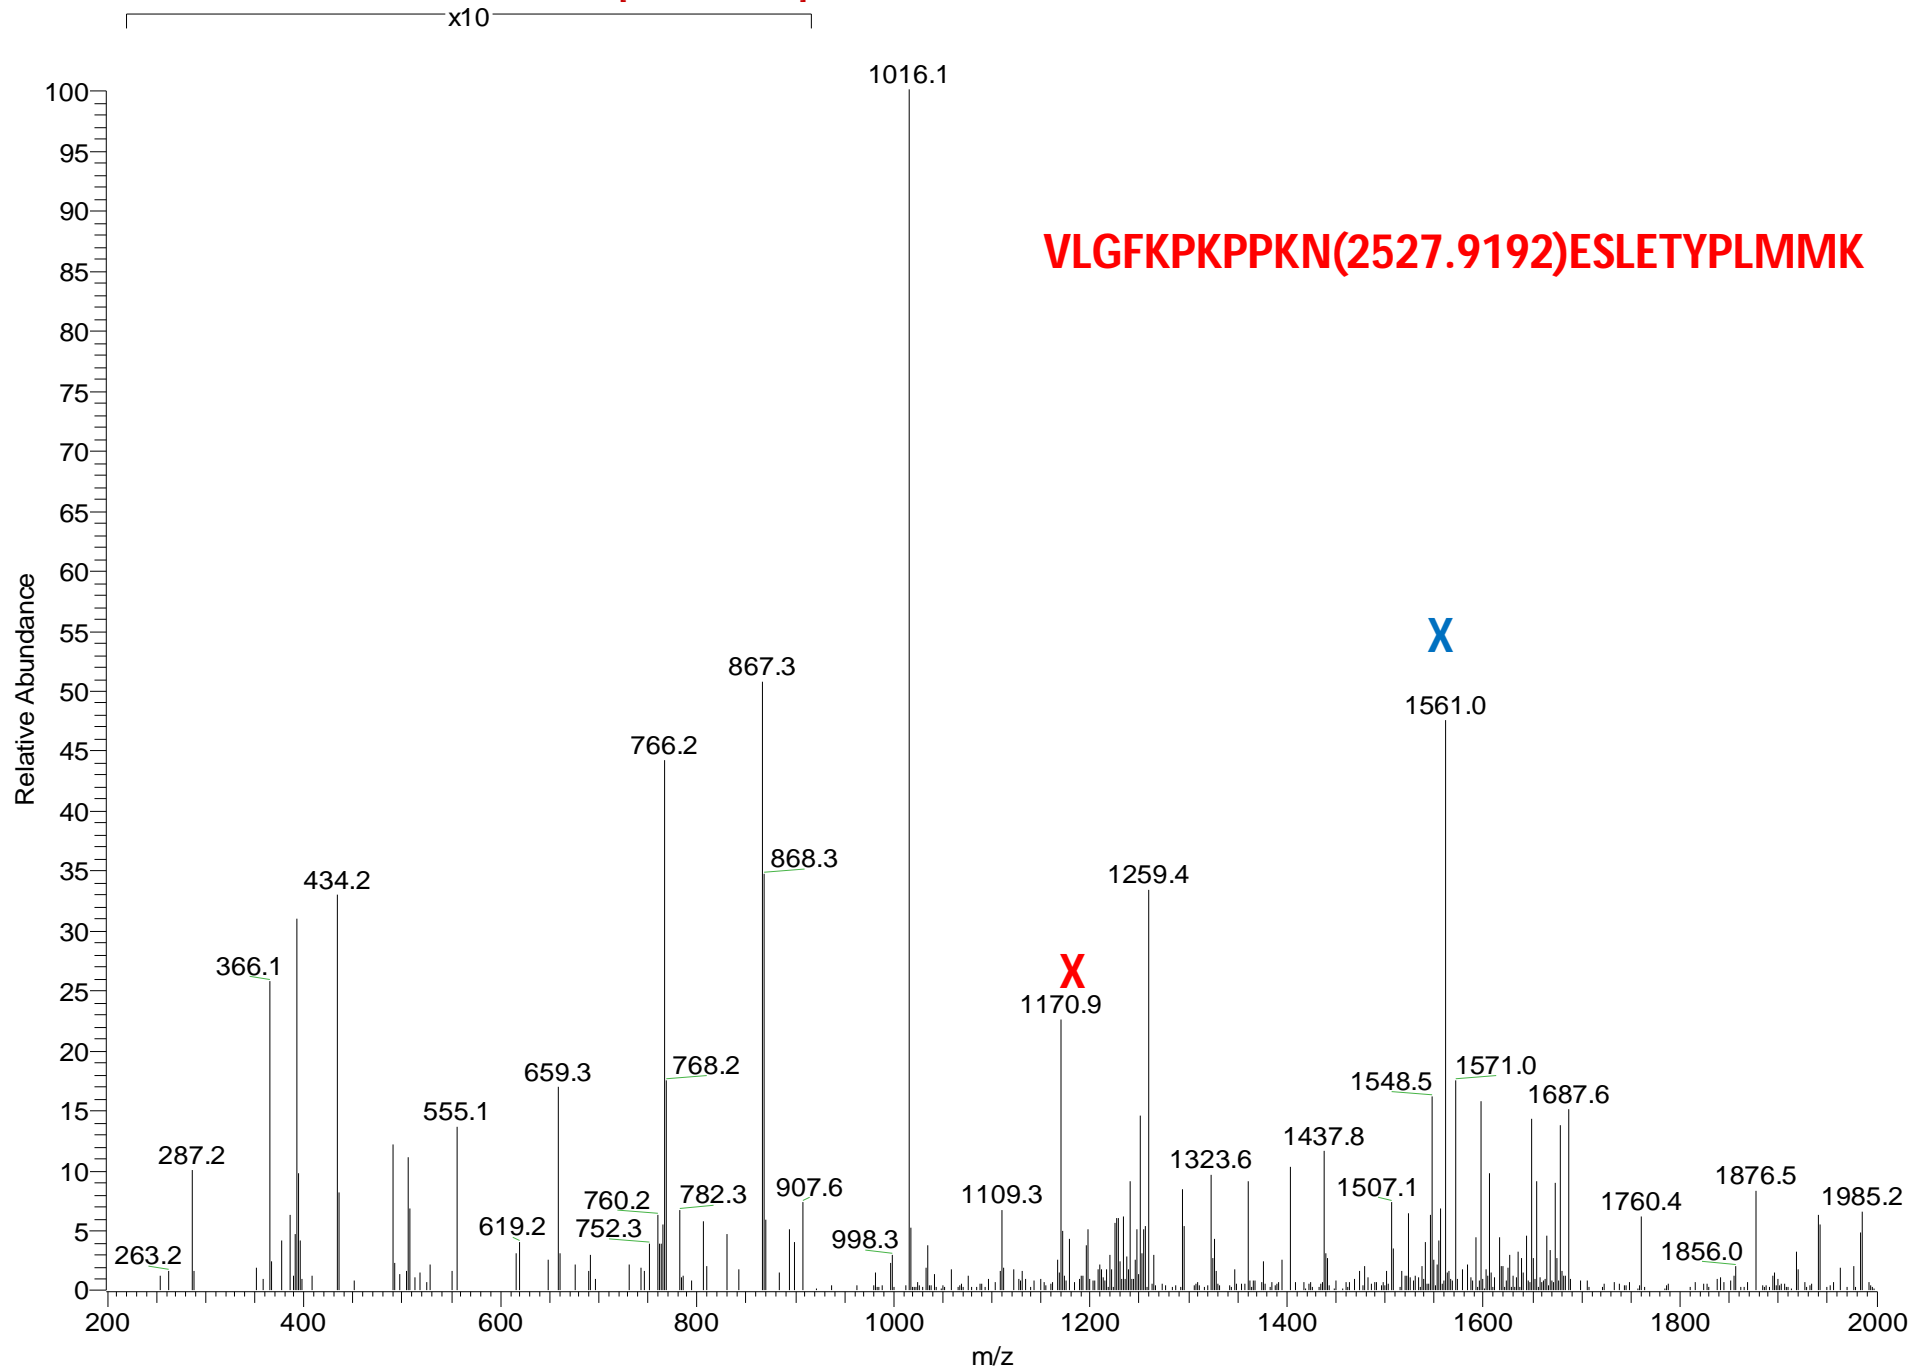

c10 ↓                      ↓ c11  
**VLGFKPKPPKN(2527.9410)ESLETYPLMMK<sup>+5</sup>**

**[-] Peak Matches**

| 287.2030                                                                                        | 366.1230                                                                                           | 377.1940                                                                                 | 385.8090                                                                       | 393.2120                                                                                  | 434.2190                                                                                                      | 491.2680                                                                                  | 506.1300                                                                       | 555.1240                                                                                 | 615.2900                                                           |
|-------------------------------------------------------------------------------------------------|----------------------------------------------------------------------------------------------------|------------------------------------------------------------------------------------------|--------------------------------------------------------------------------------|-------------------------------------------------------------------------------------------|---------------------------------------------------------------------------------------------------------------|-------------------------------------------------------------------------------------------|--------------------------------------------------------------------------------|------------------------------------------------------------------------------------------|--------------------------------------------------------------------|
| c <sub>3</sub> <sup>-0.0048</sup>                                                               |                                                                                                    |                                                                                          | b <sub>7</sub> <sup>+2</sup> (0.059)                                           | z <sub>3</sub> (0.037)<br>z+1 <sub>3</sub> <sup>-0.97</sup>                               | c <sub>4</sub> <sup>-0.057</sup><br>b <sub>8</sub> <sup>+2</sup> <sup>-0.057</sup><br>c-1 <sub>4</sub> (0.95) | c <sub>9</sub> <sup>+2</sup> <sup>-0.048</sup><br>c-1 <sub>9</sub> <sup>+2</sup> (0.46)   | z <sub>4</sub> <sup>-0.13</sup>                                                | c <sub>10</sub> <sup>+2</sup> <sup>-0.24</sup><br>c-1 <sub>10</sub> <sup>+2</sup> (0.26) |                                                                    |
| <b>619.2140</b>                                                                                 | <b>659.3210</b>                                                                                    | <b>752.3220</b>                                                                          | <b>760.2360</b>                                                                | <b>763.0550</b>                                                                           | <b>766.1680</b>                                                                                               | <b>782.3380</b>                                                                           | <b>806.5890</b>                                                                | <b>831.2010</b>                                                                          | <b>867.2870</b>                                                    |
| y <sub>5</sub> <sup>-0.12</sup>                                                                 | c <sub>6</sub> <sup>-0.10</sup><br>c-1 <sub>6</sub> (0.90)                                         |                                                                                          |                                                                                |                                                                                           | z <sub>6</sub> <sup>-0.21</sup>                                                                               | y <sub>6</sub> <sup>-0.056</sup>                                                          |                                                                                |                                                                                          | z <sub>7</sub> <sup>-0.14</sup><br>b <sub>8</sub> <sup>-0.26</sup> |
| <b>1109.3350</b>                                                                                | <b>1170.9150</b>                                                                                   | <b>1240.9500</b>                                                                         | <b>1251.5210</b>                                                               | <b>1294.1600</b>                                                                          | <b>1323.6360</b>                                                                                              | <b>1360.8740</b>                                                                          | <b>1404.4800</b>                                                               | <b>1437.7870</b>                                                                         | <b>1507.1300</b>                                                   |
| z <sub>9</sub> <sup>-0.21</sup><br>c <sub>10</sub> <sup>-0.38</sup><br>c-1 <sub>10</sub> (0.62) | c-1 <sub>19</sub> <sup>+4</sup> <sup>-0.63</sup><br>c <sub>19</sub> <sup>+4</sup> <sup>-0.88</sup> | z+1 <sub>21</sub> <sup>+4</sup> <sup>-0.11</sup><br>z <sub>21</sub> <sup>+4</sup> (0.14) | c <sub>11</sub> <sup>+3</sup> (0.28)<br>c-1 <sub>11</sub> <sup>+3</sup> (0.62) | c <sub>12</sub> <sup>+3</sup> <sup>-0.093</sup><br>c-1 <sub>12</sub> <sup>+3</sup> (0.24) | c <sub>13</sub> <sup>+3</sup> (0.37)<br>c-1 <sub>13</sub> <sup>+3</sup> (0.71)                                | c <sub>14</sub> <sup>+3</sup> <sup>-0.085</sup><br>c-1 <sub>14</sub> <sup>+3</sup> (0.25) | c <sub>15</sub> <sup>+3</sup> (0.51)<br>c-1 <sub>15</sub> <sup>+3</sup> (0.84) | c <sub>16</sub> <sup>+3</sup> (0.13)<br>c-1 <sub>16</sub> <sup>+3</sup> (0.47)           |                                                                    |
| <b>1548.5120</b>                                                                                | <b>1556.5170</b>                                                                                   | <b>1561.0290</b>                                                                         | <b>1570.9830</b>                                                               | <b>1598.1310</b>                                                                          | <b>1606.0590</b>                                                                                              | <b>1649.7070</b>                                                                          | <b>1654.9930</b>                                                               | <b>1876.5470</b>                                                                         | <b>1985.2280</b>                                                   |
| z <sub>18</sub> <sup>+3</sup> (0.16)<br>z+1 <sub>18</sub> <sup>+3</sup> <sup>-0.18</sup>        | b <sub>19</sub> <sup>+3</sup> (0.14)                                                               | c-1 <sub>19</sub> <sup>+3</sup> <sup>-0.69</sup>                                         |                                                                                | z+1 <sub>19</sub> <sup>+3</sup> (0.42)<br>z <sub>19</sub> <sup>+3</sup> (0.75)            | c <sub>20</sub> <sup>+3</sup> (0.32)<br>c-1 <sub>20</sub> <sup>+3</sup> (0.66)                                | c <sub>21</sub> <sup>+3</sup> (0.29)<br>c-1 <sub>21</sub> <sup>+3</sup> (0.63)            | z+1 <sub>21</sub> <sup>+3</sup> (0.58)<br>z <sub>21</sub> <sup>+3</sup> (0.91) | c <sub>11</sub> <sup>+2</sup> (0.19)<br>c-1 <sub>11</sub> <sup>+2</sup> (0.70)           | c <sub>13</sub> <sup>+2</sup> (0.84)                               |

V20100910-12 #5801 RT: 45.41 AV: 1 NL: 5.00E3  
F: ITMS + c NSI d w sa Full ms2 1045.08@etd40.00 [50.00-2000.00]

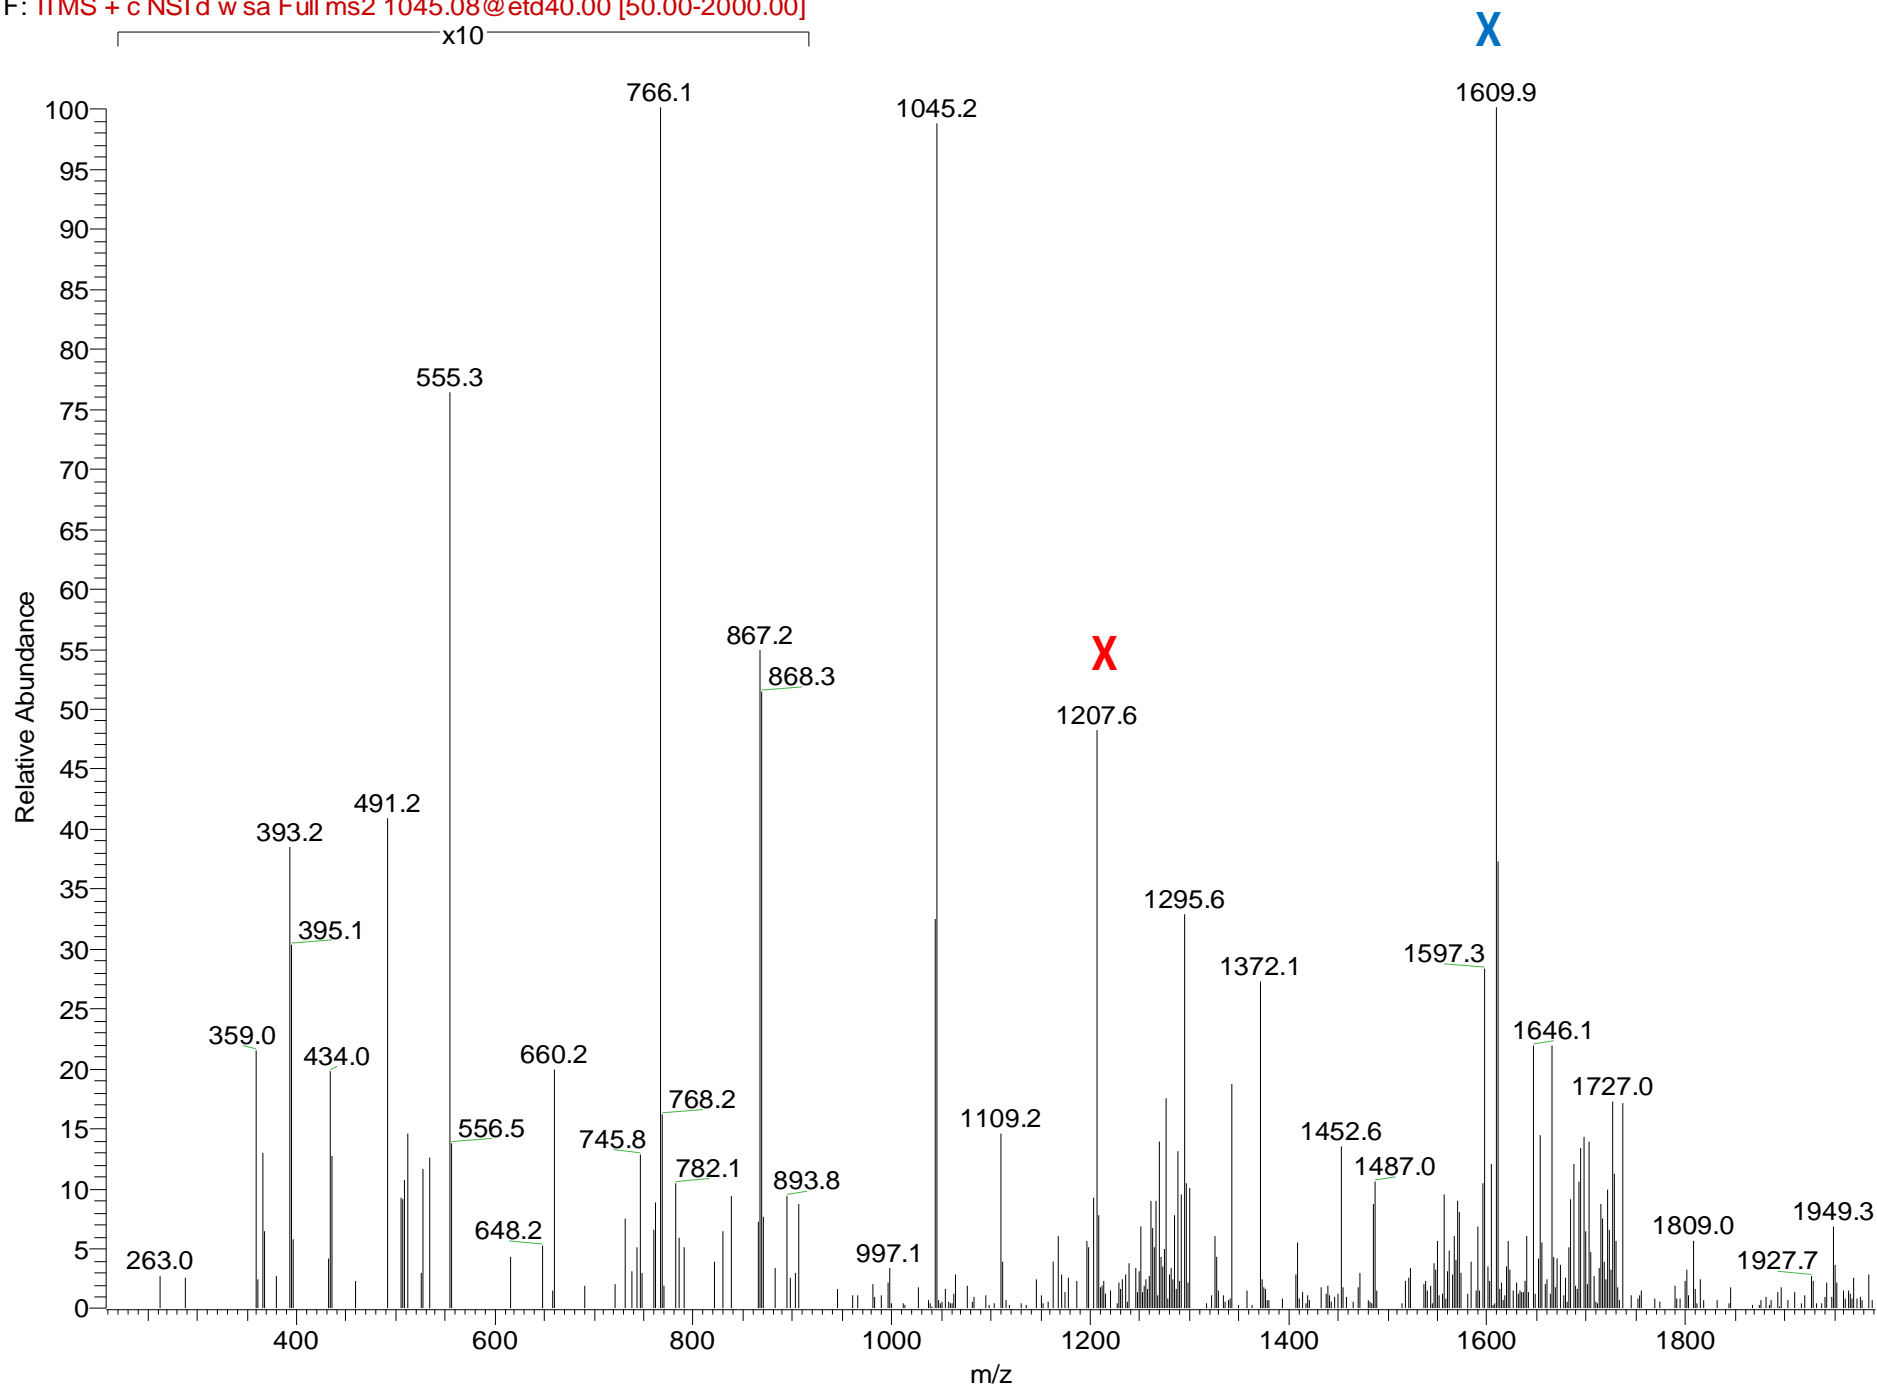

/20100910-12 #5790 RT: 45.33 AV: 1 NL: 1.44E3  
F: ITMS + c NSI d w sa Full ms2 1057.09@etd40.00 [50.00-2000.00]

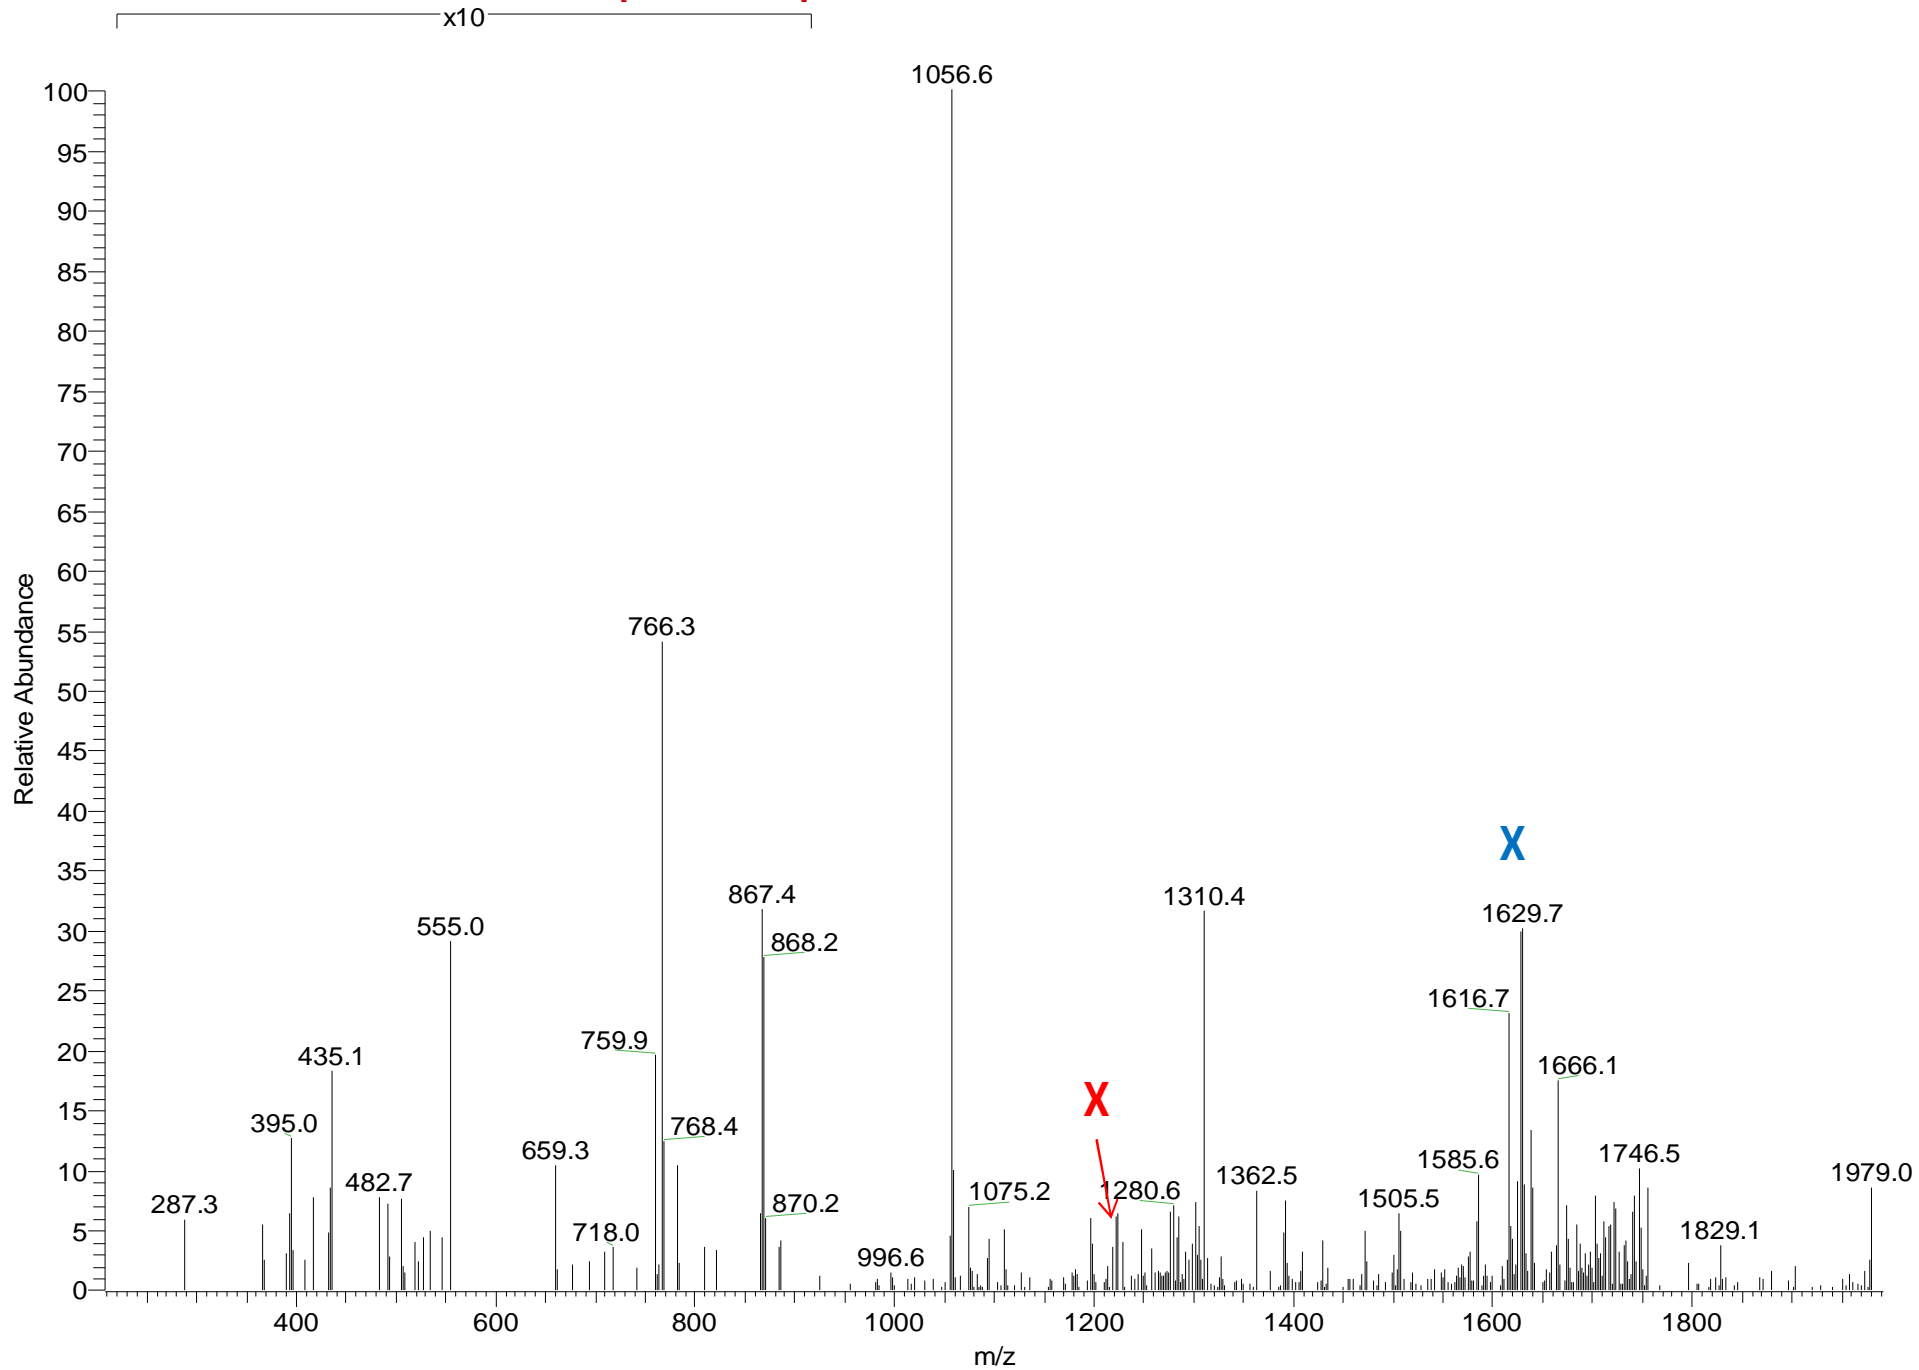

V20100910-12 #5794 RT: 45.36 AV: 1 NL: 4.78E3  
F: ITMS + c NSI d w sa Full ms2 1074.70@etd40.00 [50.00-2000.00]

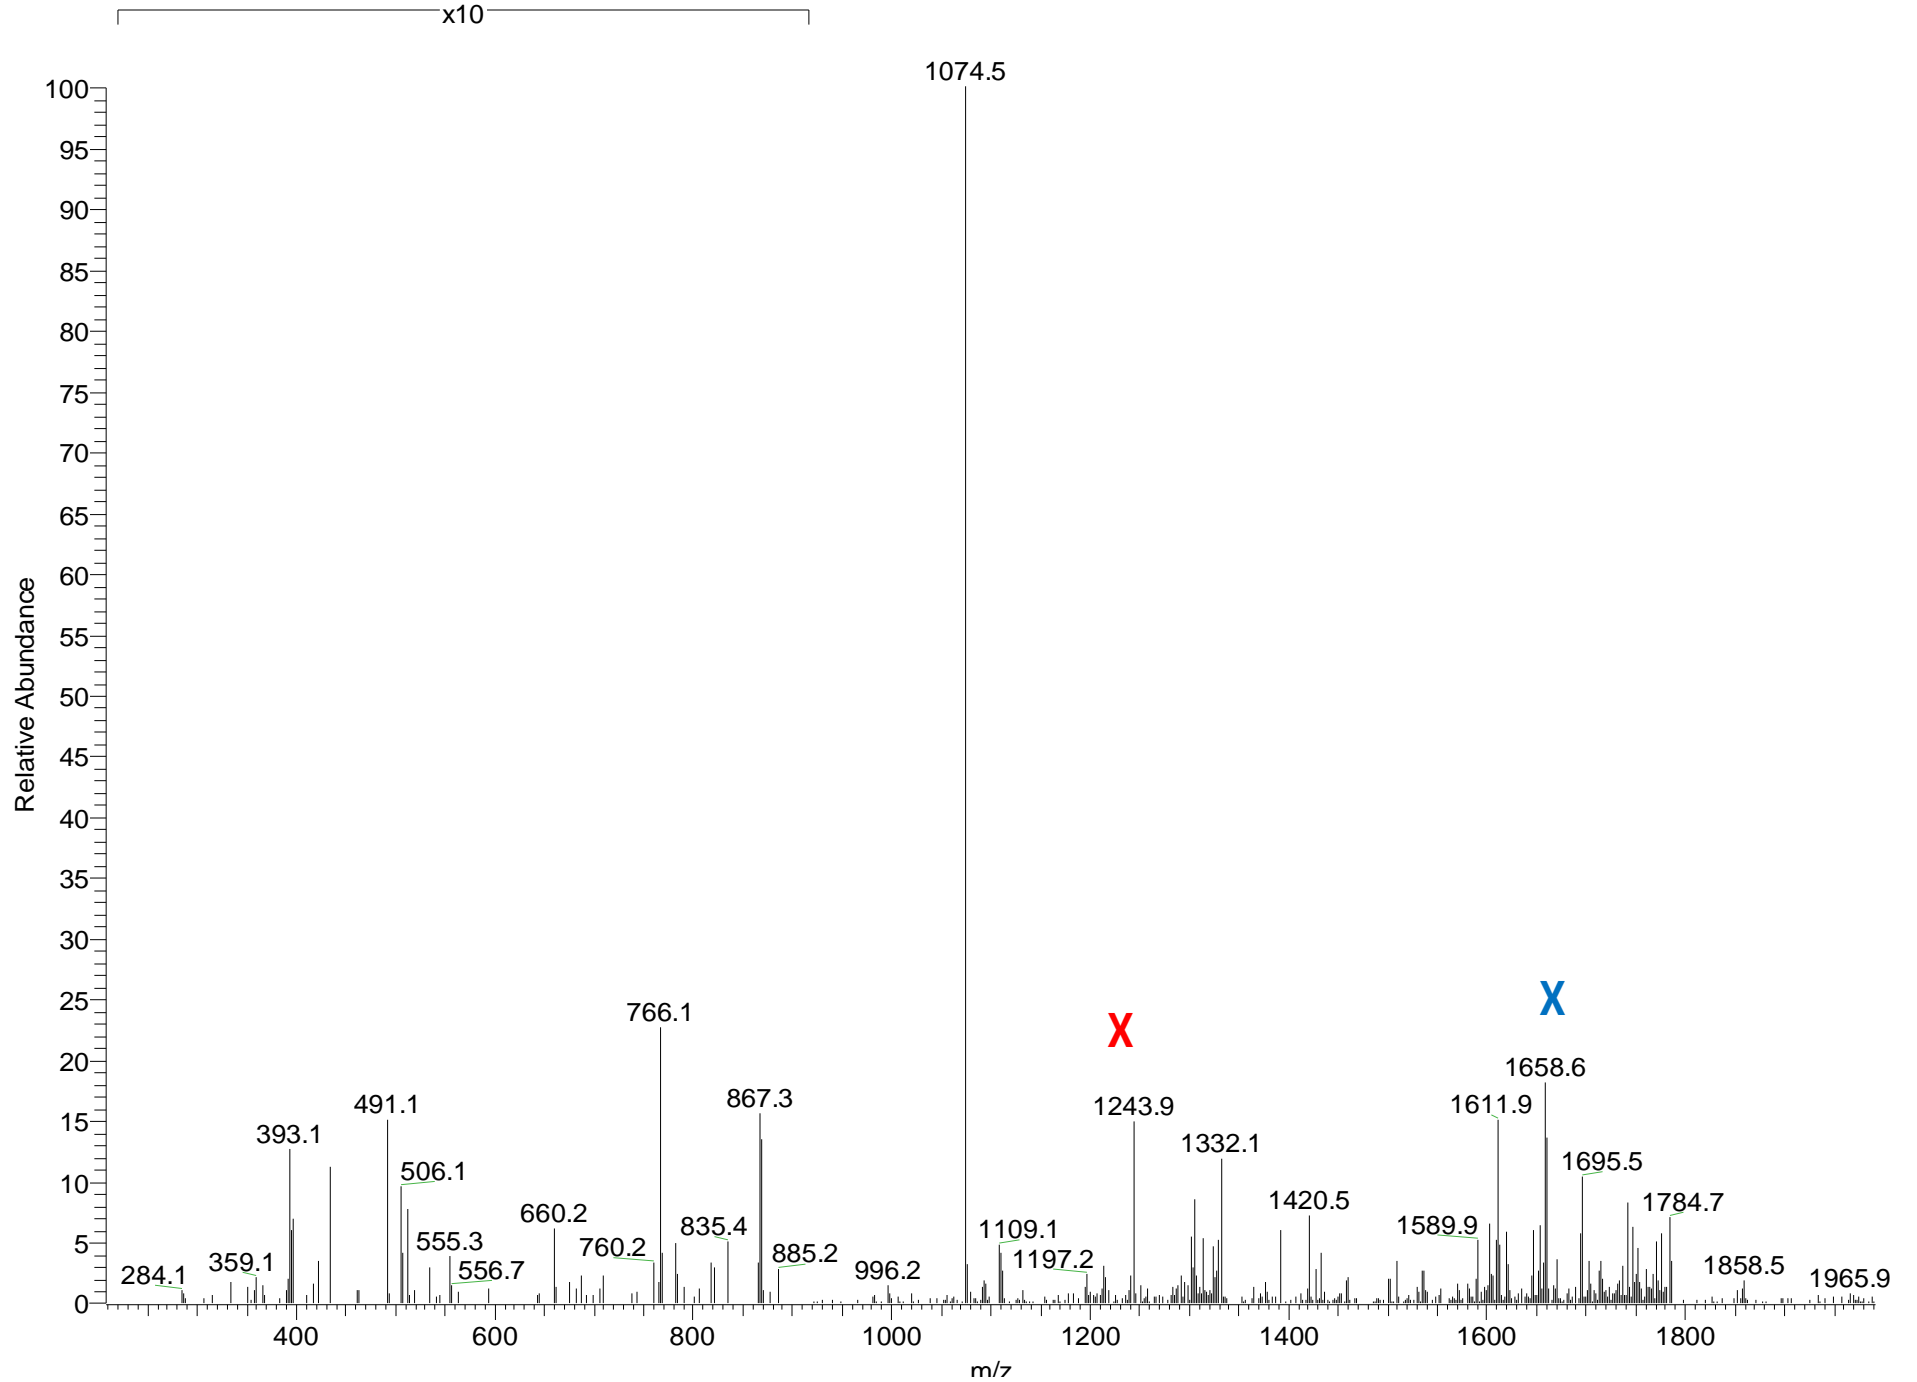

V20100910-12 #5766 RT: 45.15 AV: 1 NL: 4.09E3  
F: ITMS + c NSI d w sa Full ms2 1085.70@etd40.00 [50.00-2000.00]

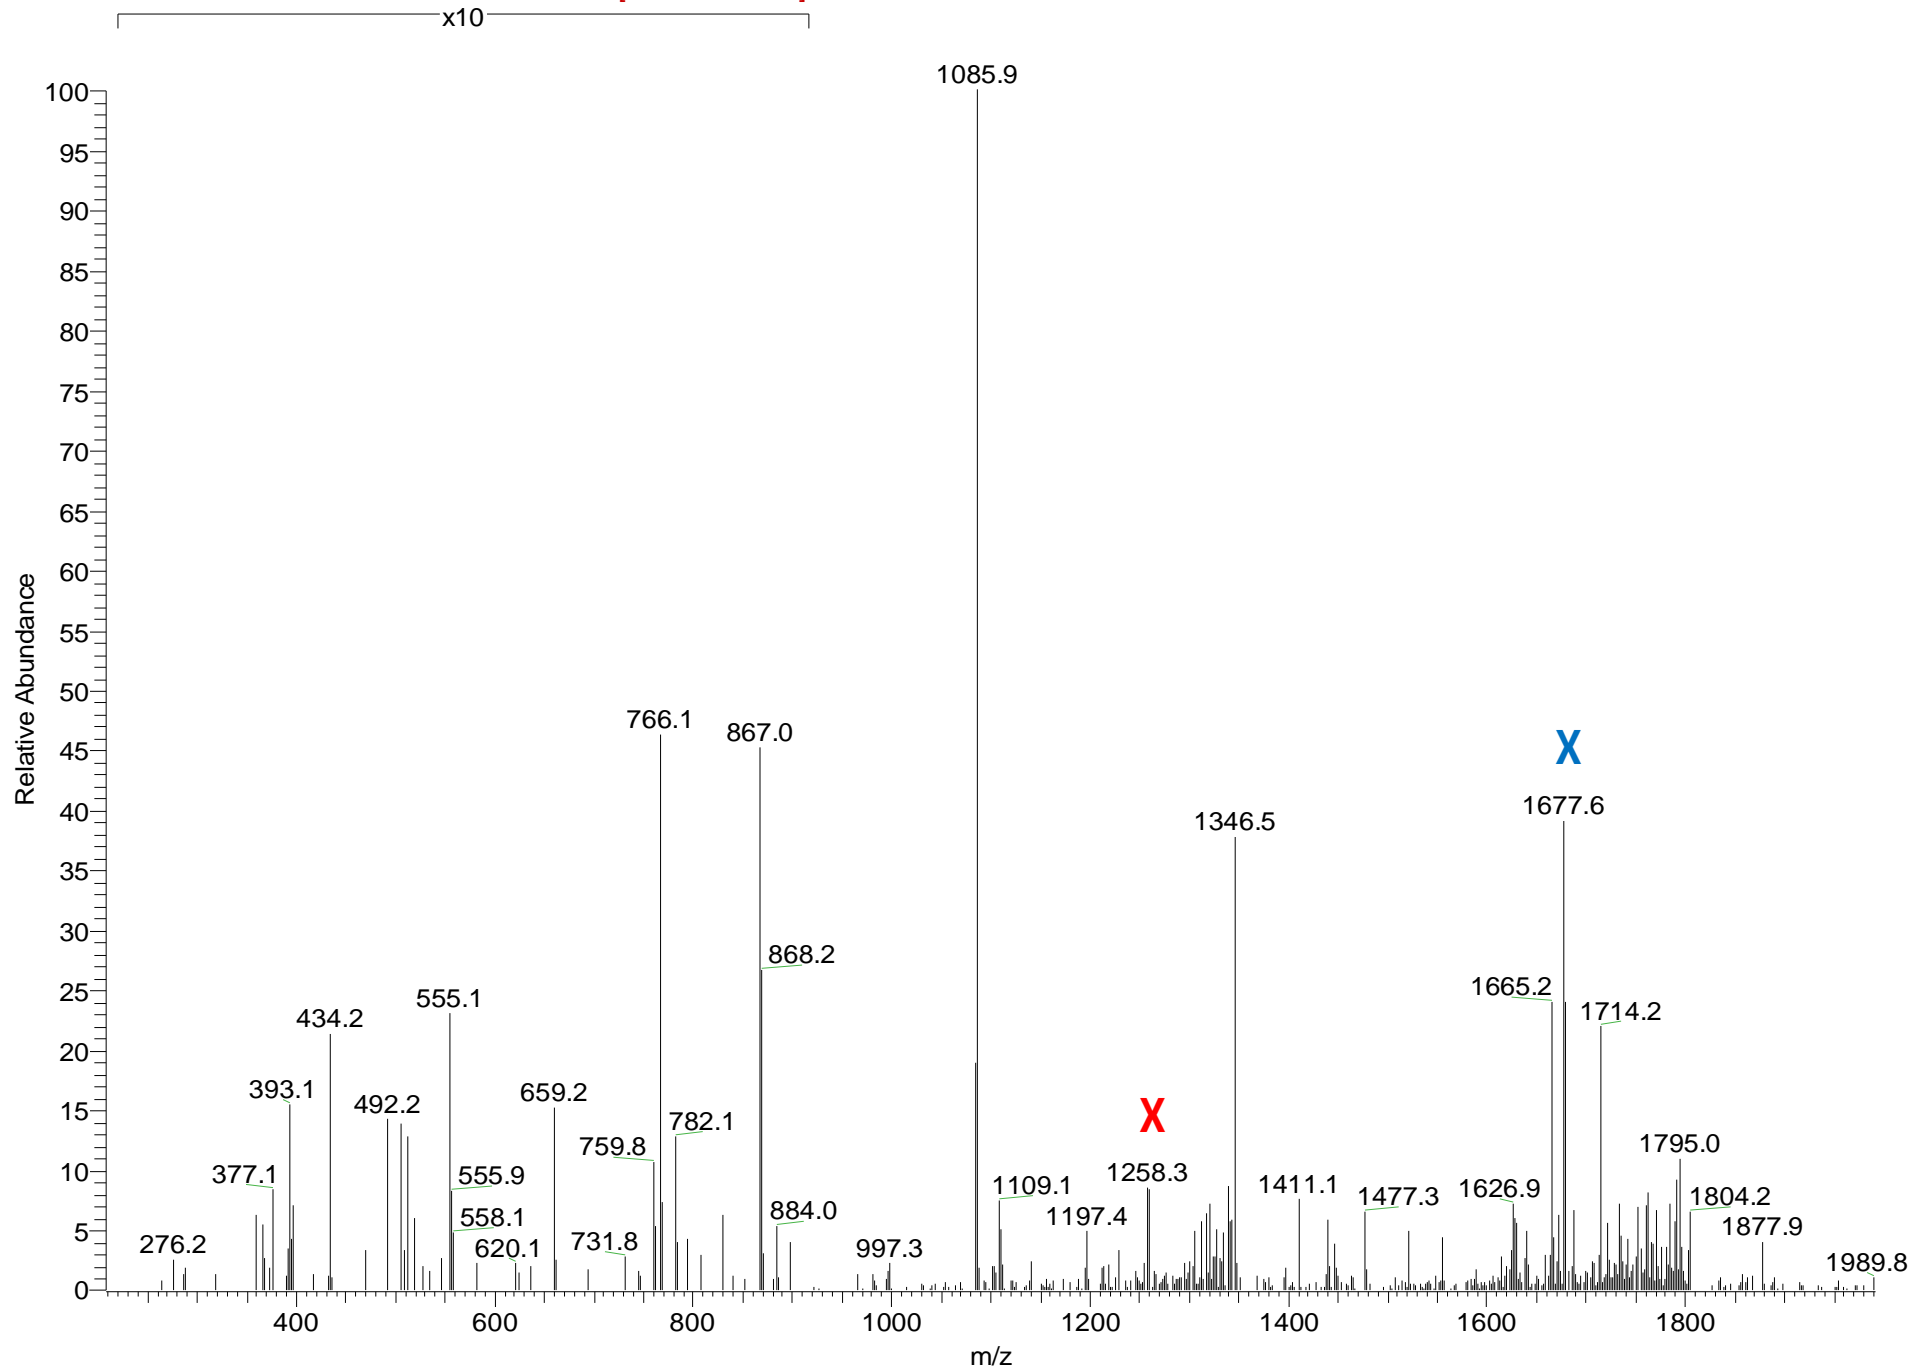



V20100910-12 #5734 RT: 44.91 AV: 1 NL: 2.27E3  
F: ITMS + c NSI d w sa Full ms2 1088.90@etd40.00 [50.00-2000.00]

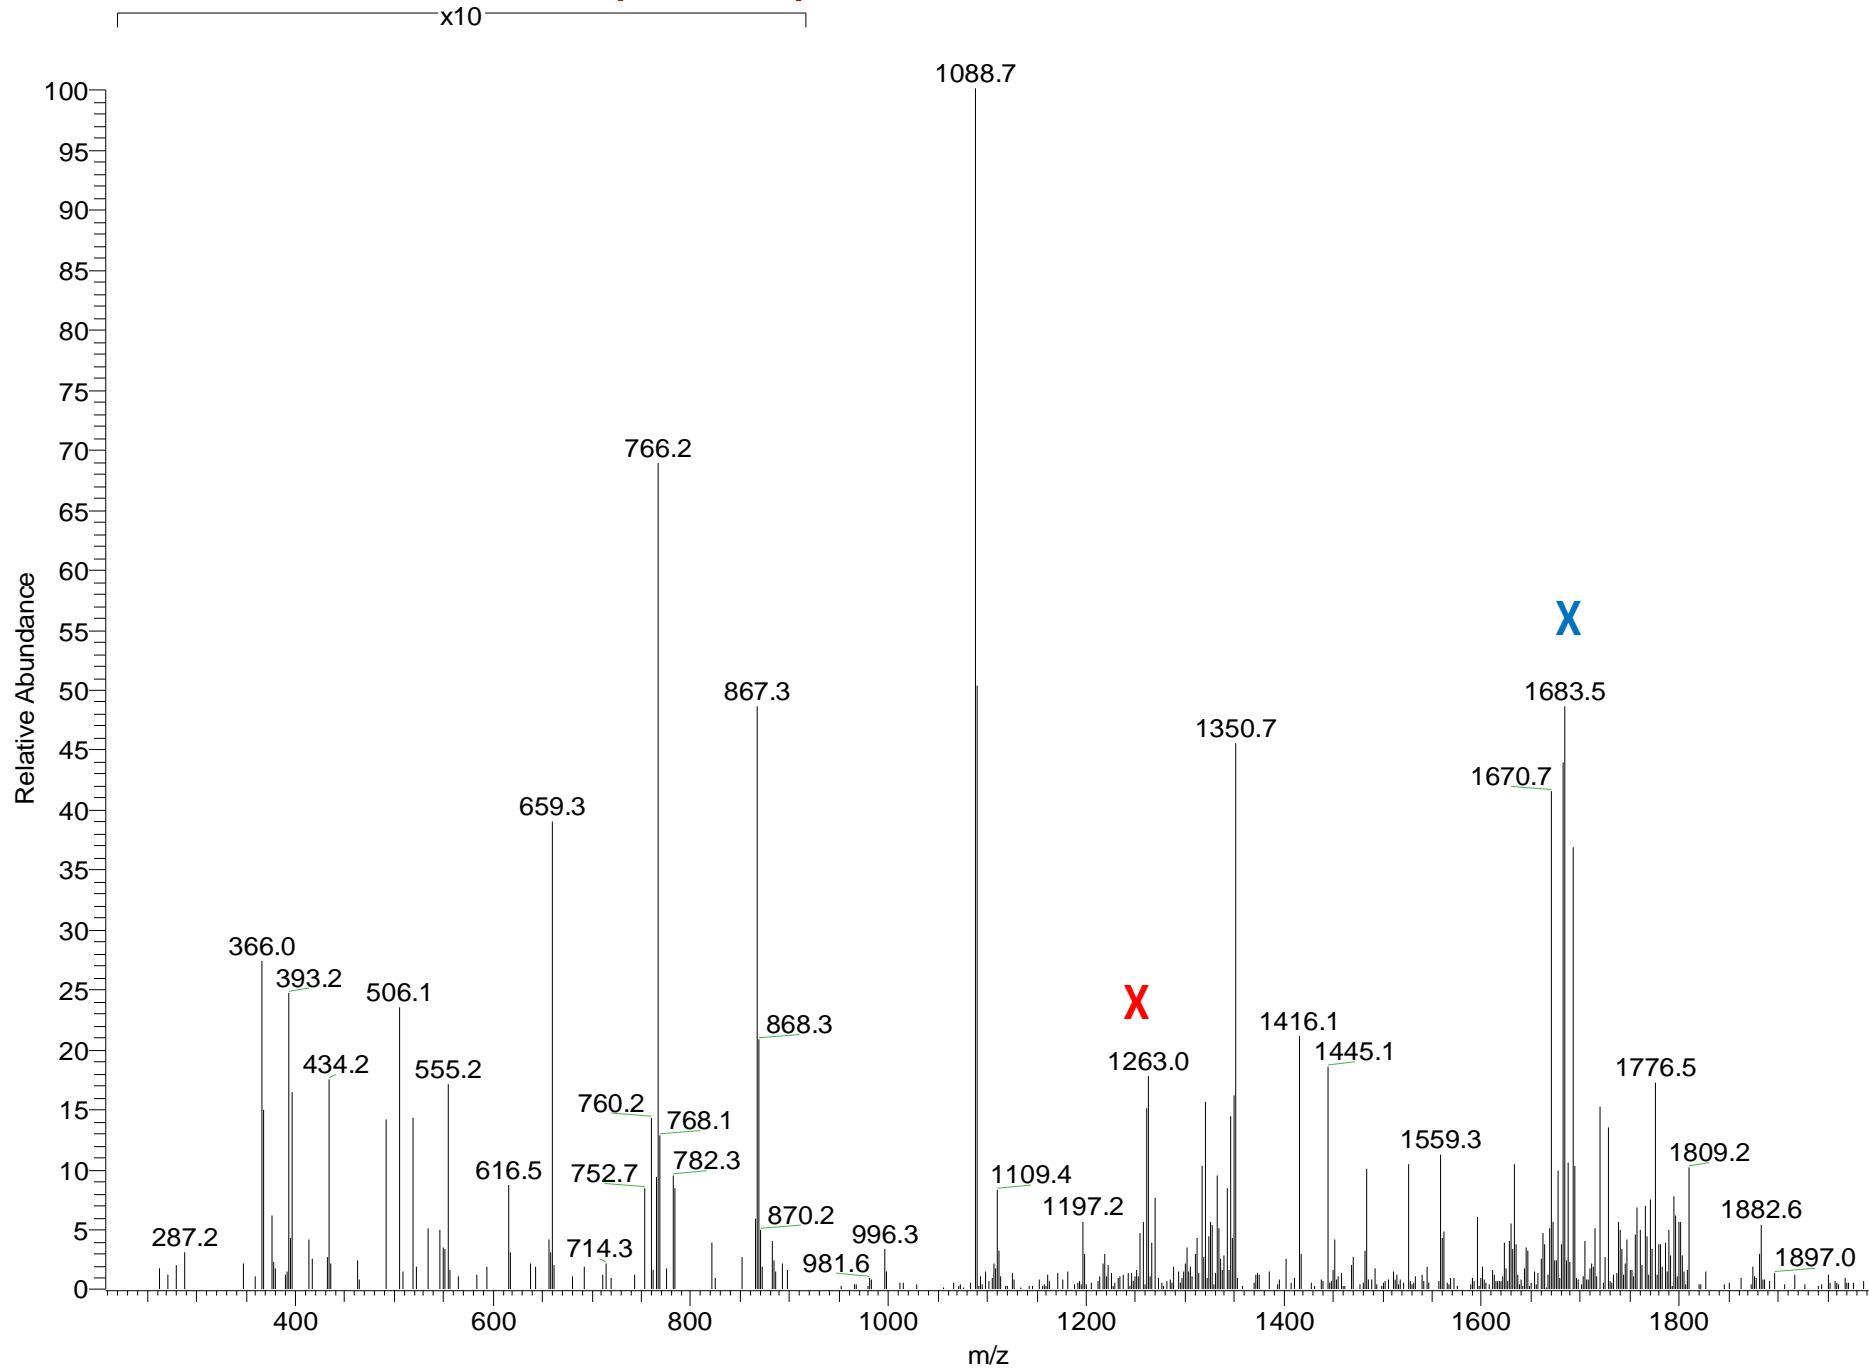

V20100910-12 #5795 RT: 45.37 AV: 1 NL: 1.75E3  
F: ITMS + c NSI d w sa Full ms2 1097.50@etd40.00 [50.00-2000.00]

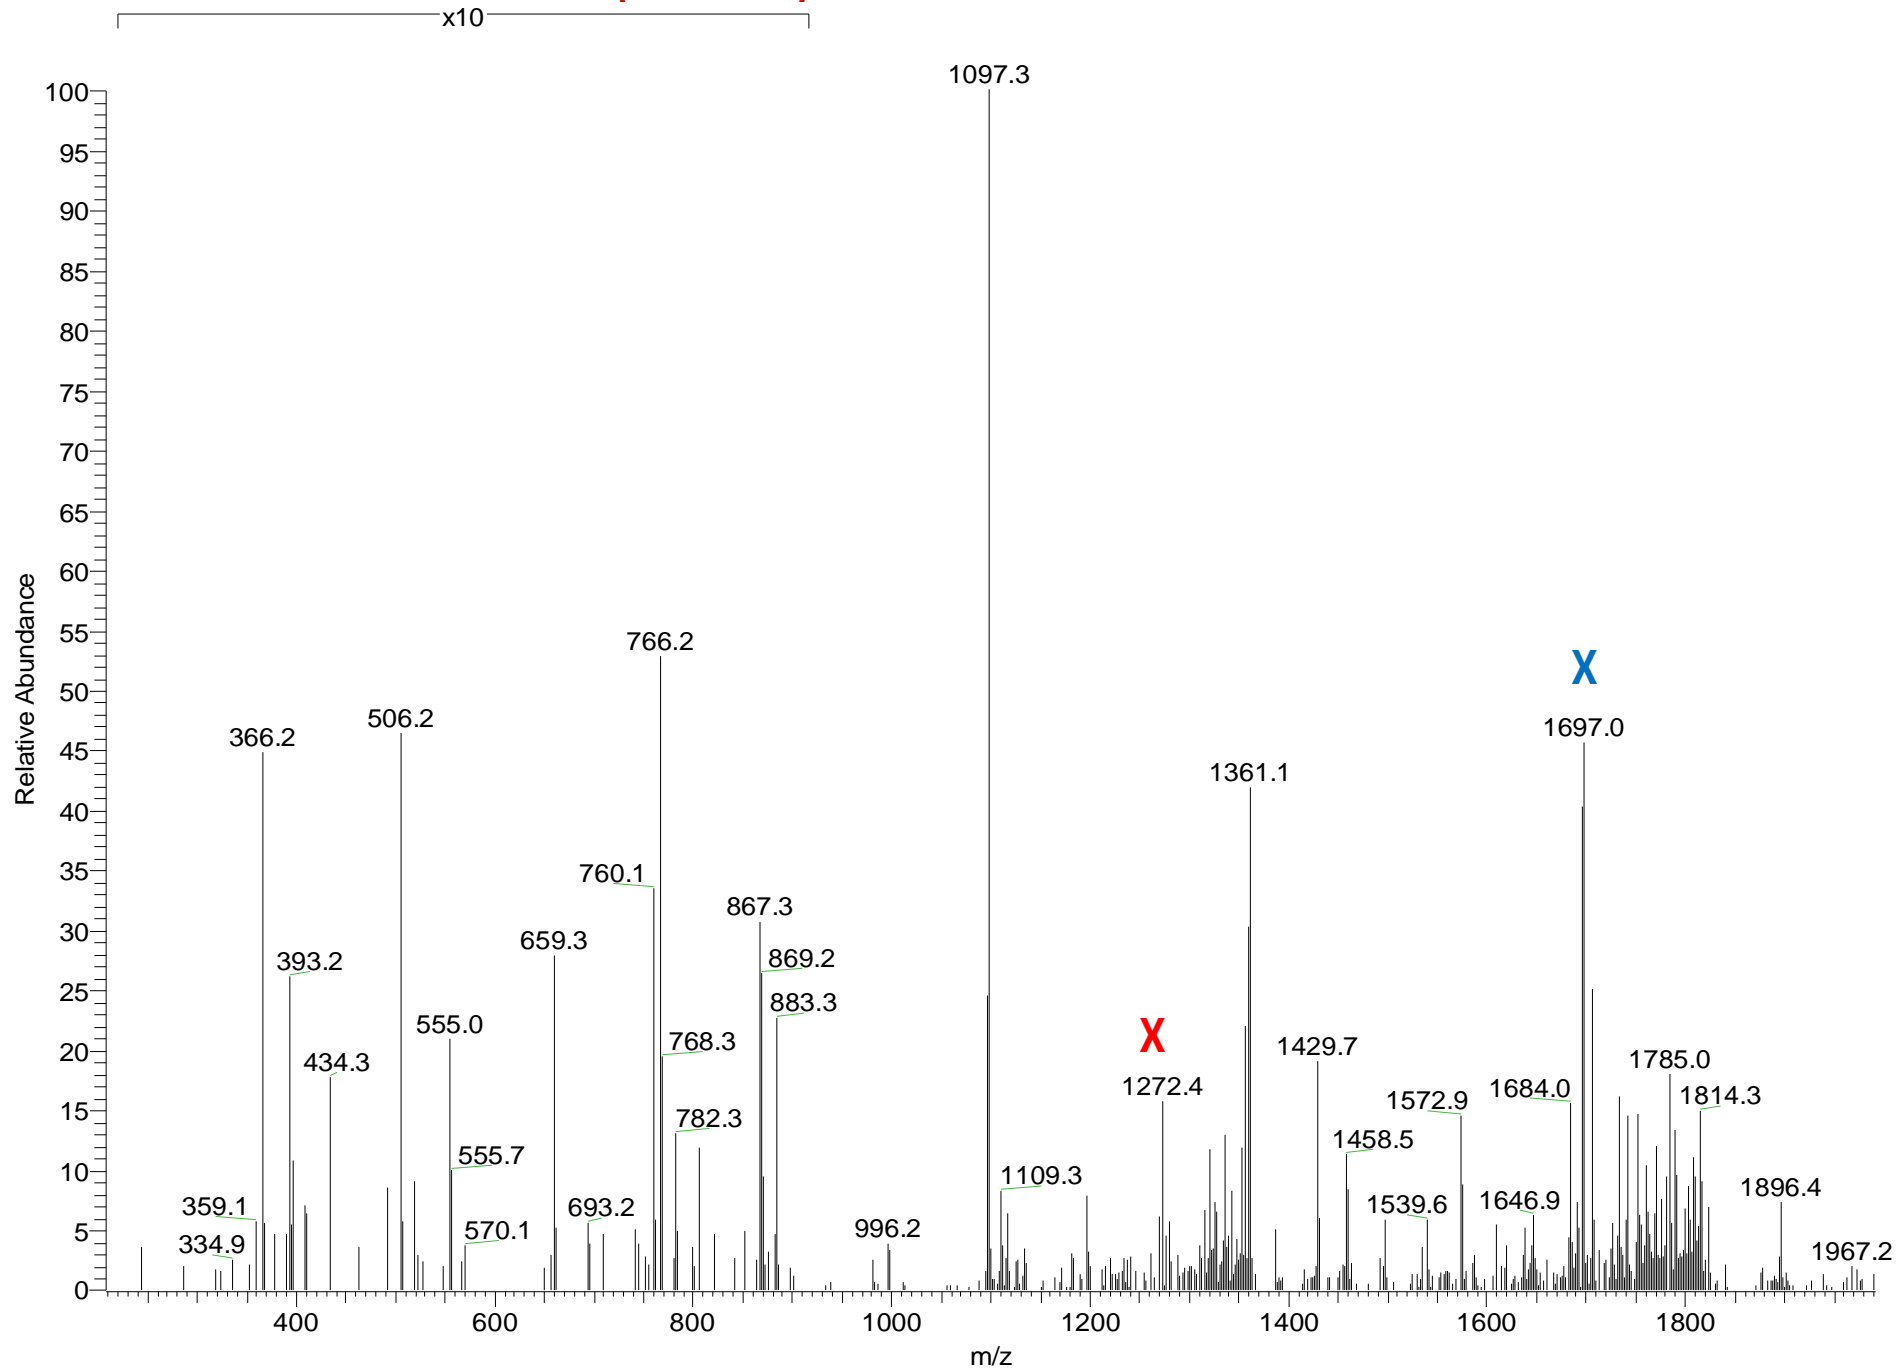

V20100910-12 #5742 RT: 44.97 AV: 1 NL: 2.40E3  
F: ITMS + c NSI d w sa Full ms2 1115.10@etd40.00 [50.00-2000.00]

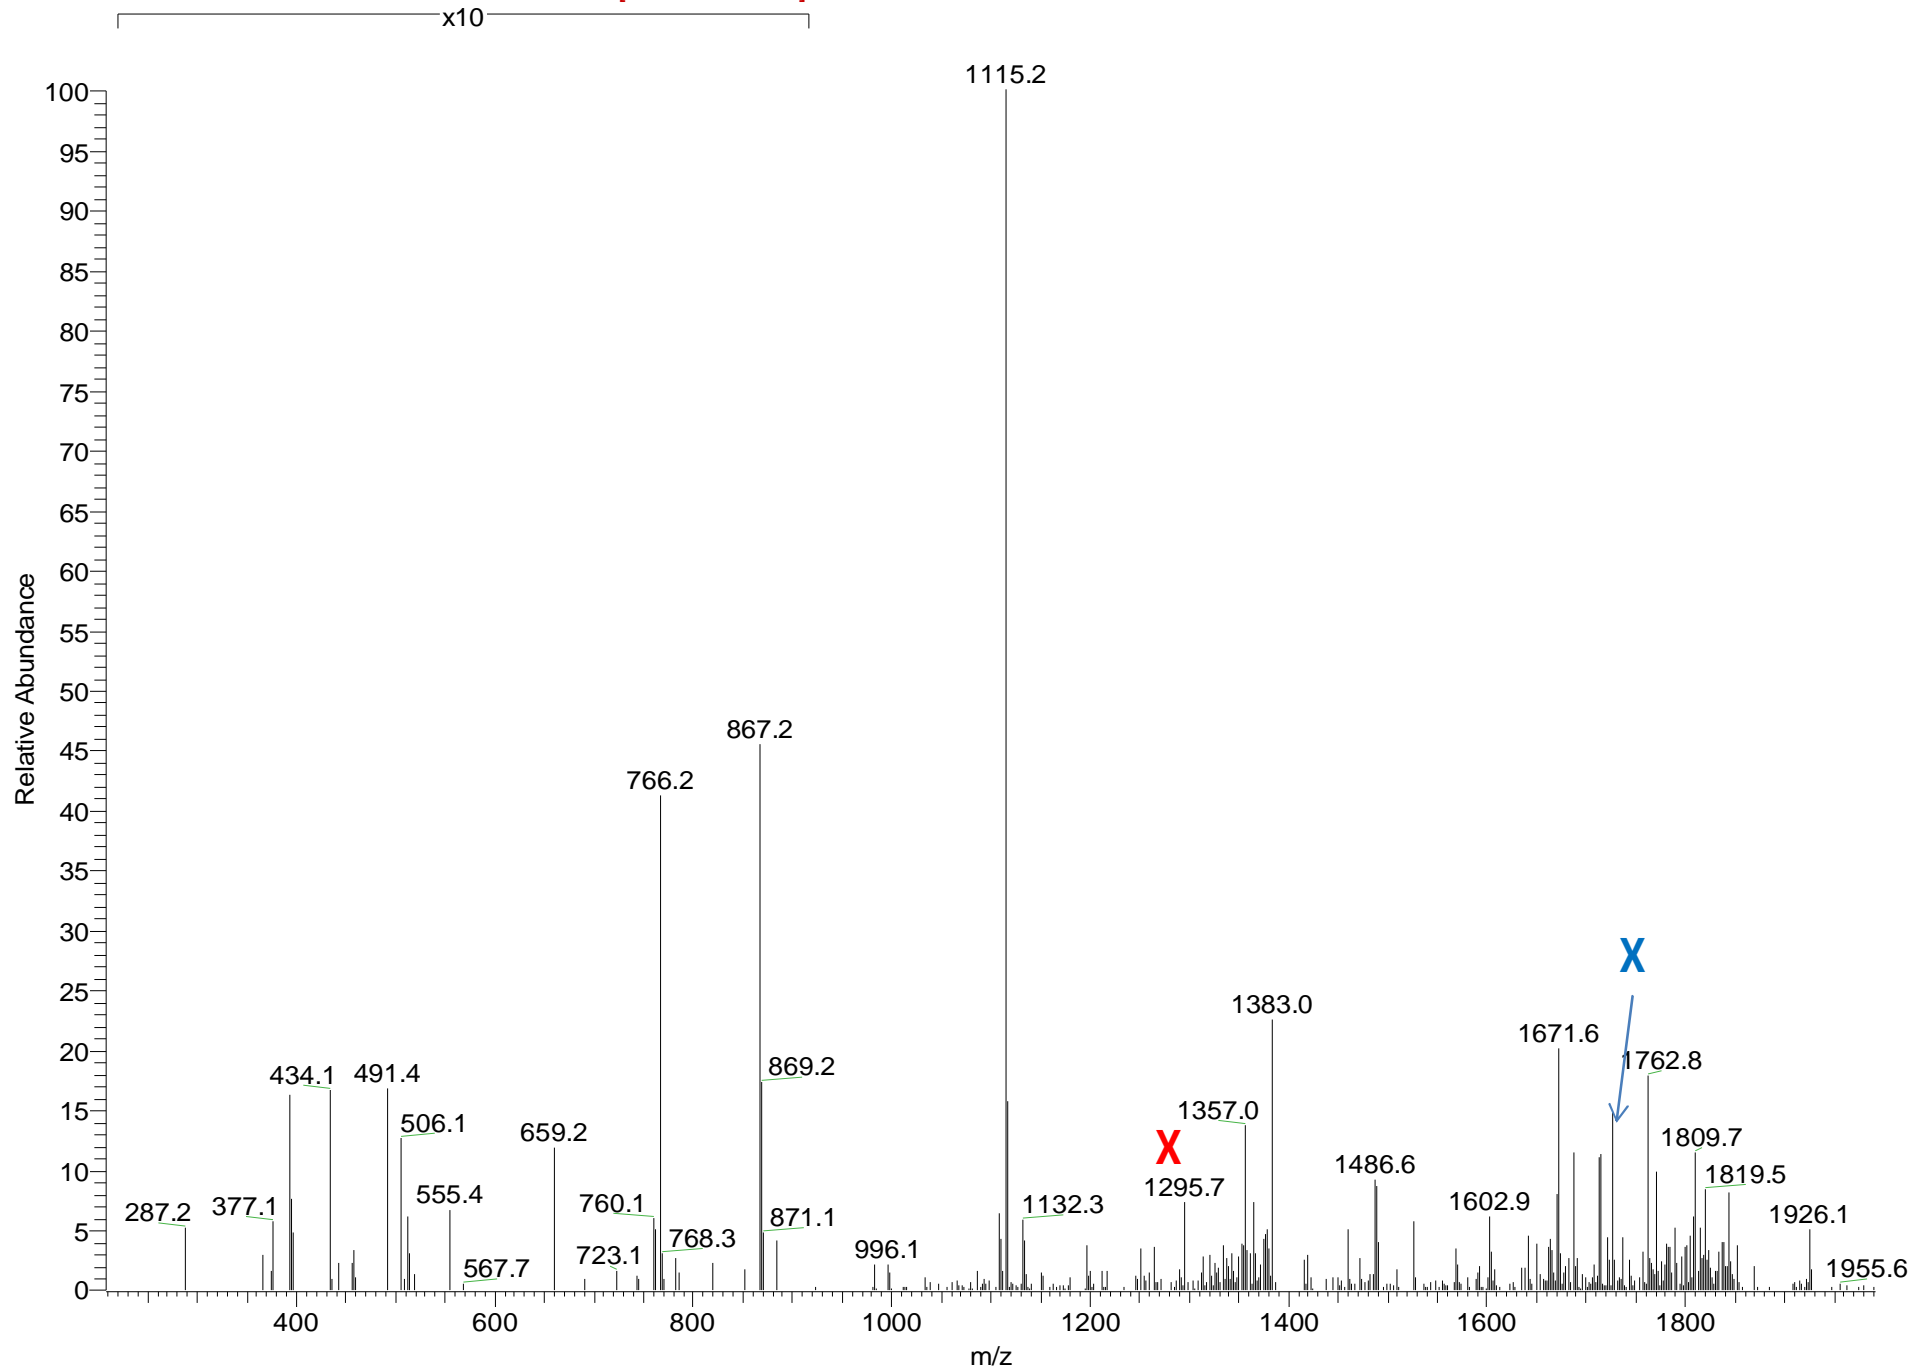

V20100910-12 #5712 RT: 44.73 AV: 1 NL: 1.31E3  
F: ITMS + c NSI d w sa Full ms2 1118.11@etd40.00 [50.00-2000.00]

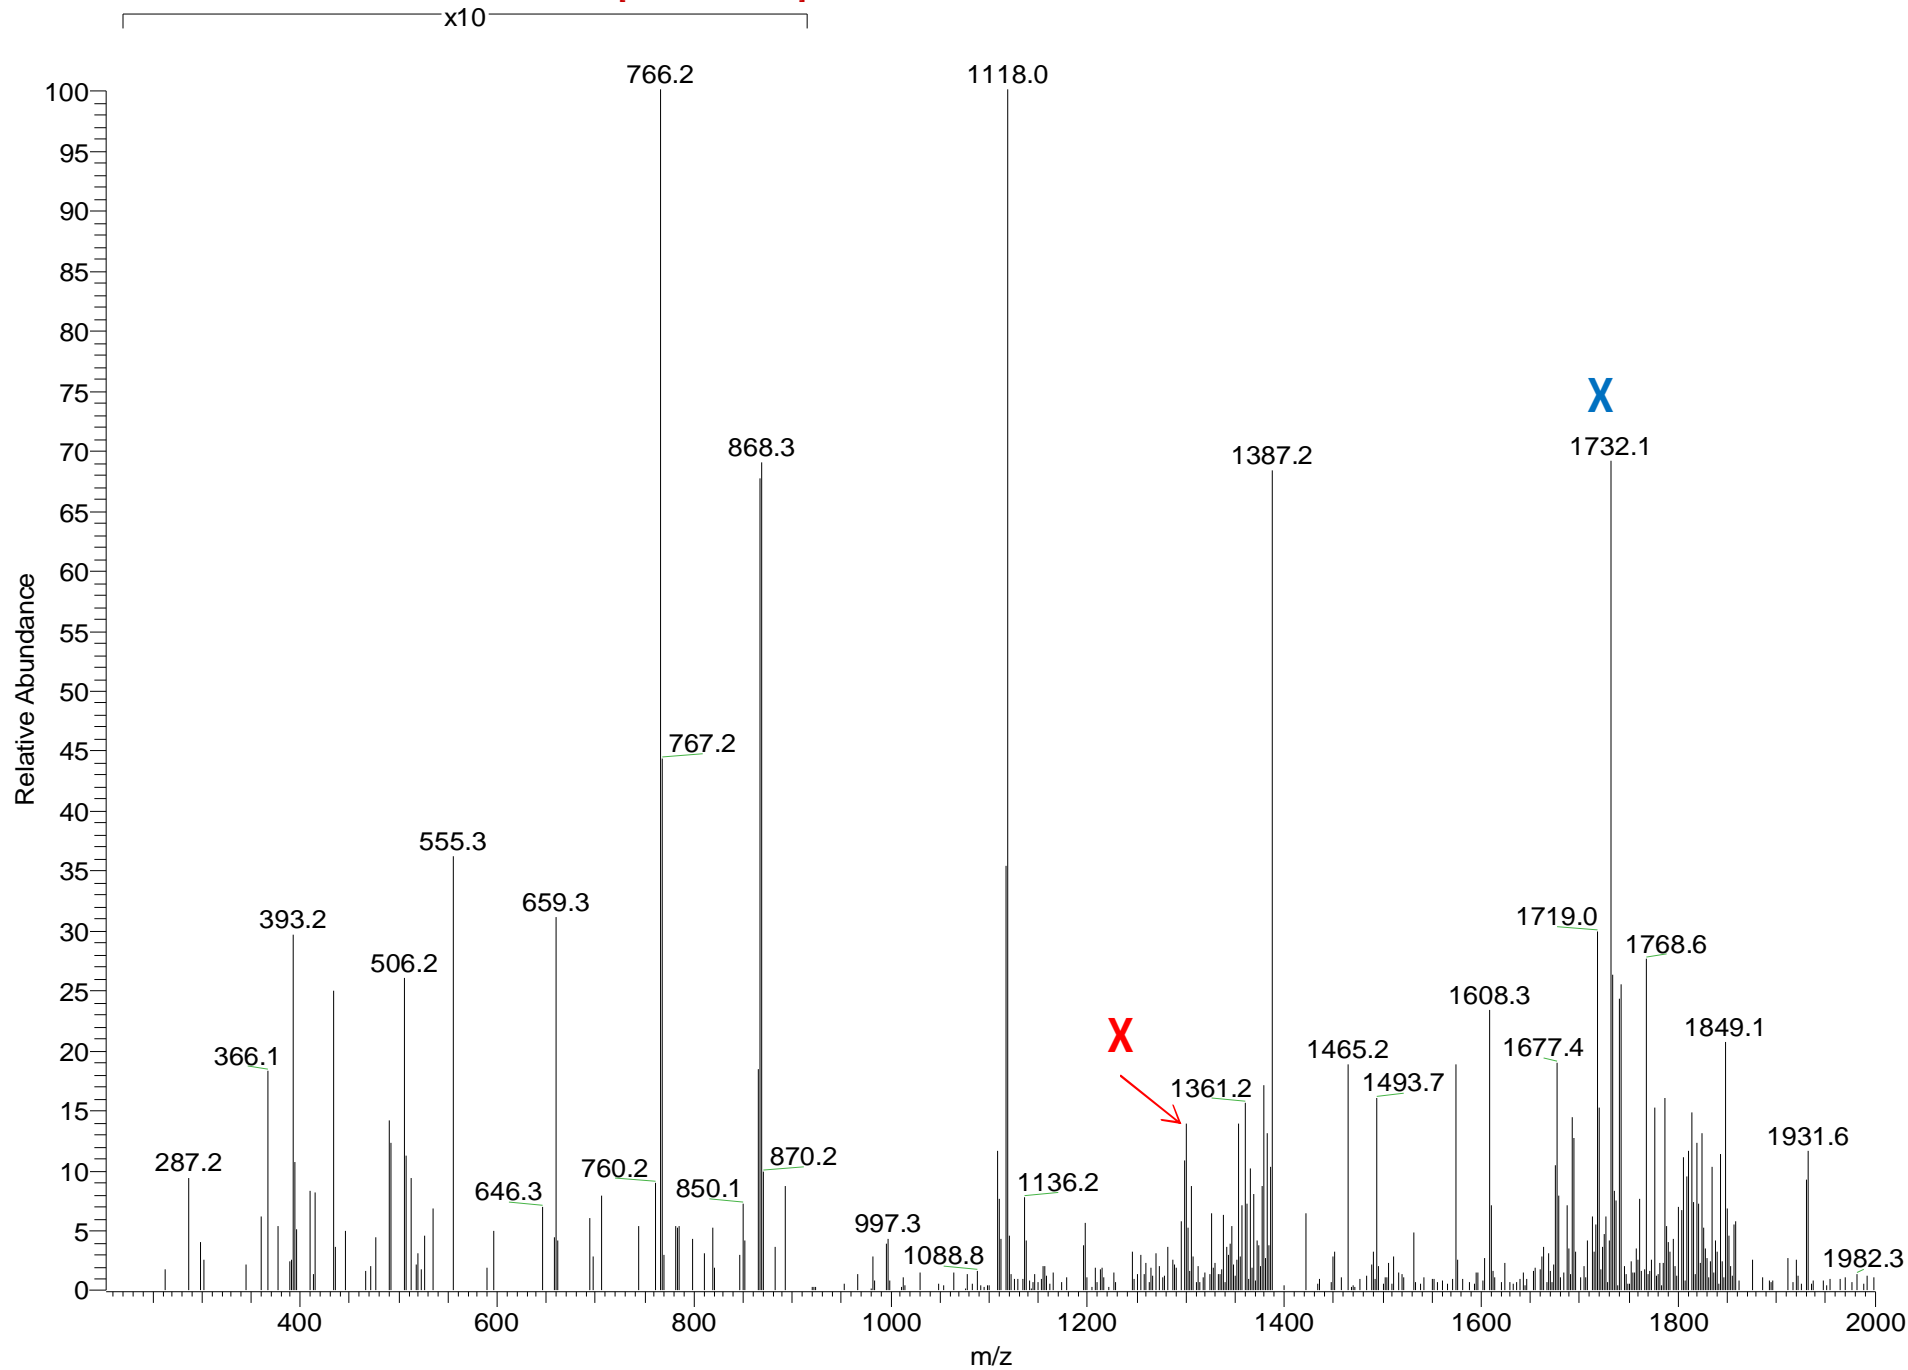

V20100910-12 #5740 RT: 44.96 AV: 1 NL: 3.27E3  
F: ITMS + c NSI d w sa Full ms2 1126.31 @etd40.00 [50.00-2000.00]

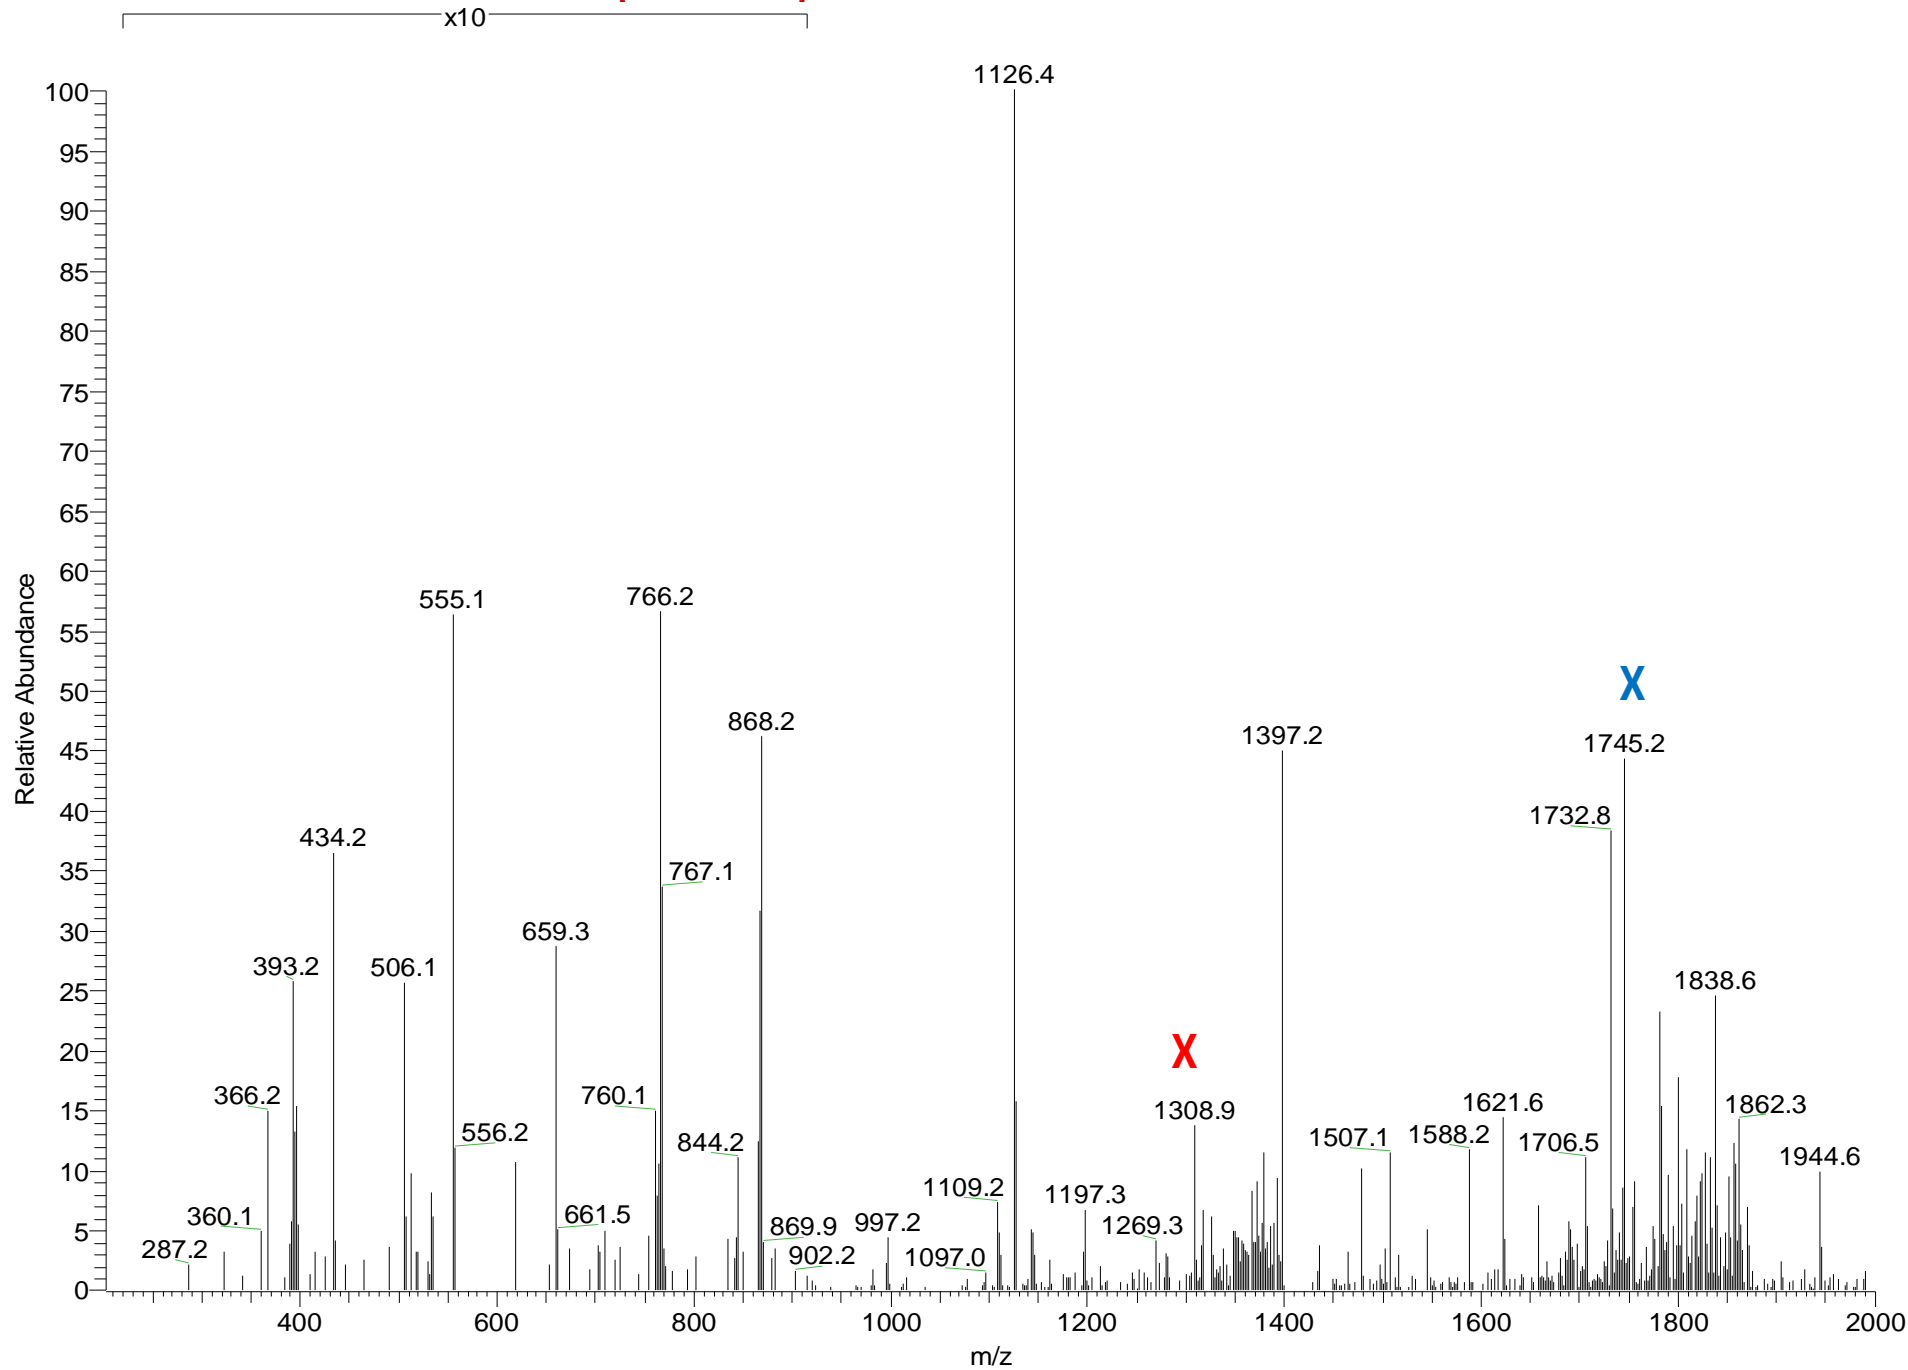

V20100910-12 #5759 RT: 45.09 AV: 1 NL: 4.97E3  
F: ITMS + c NSI d w sa Full ms2 1147.32@etd40.00 [50.00-2000.00]

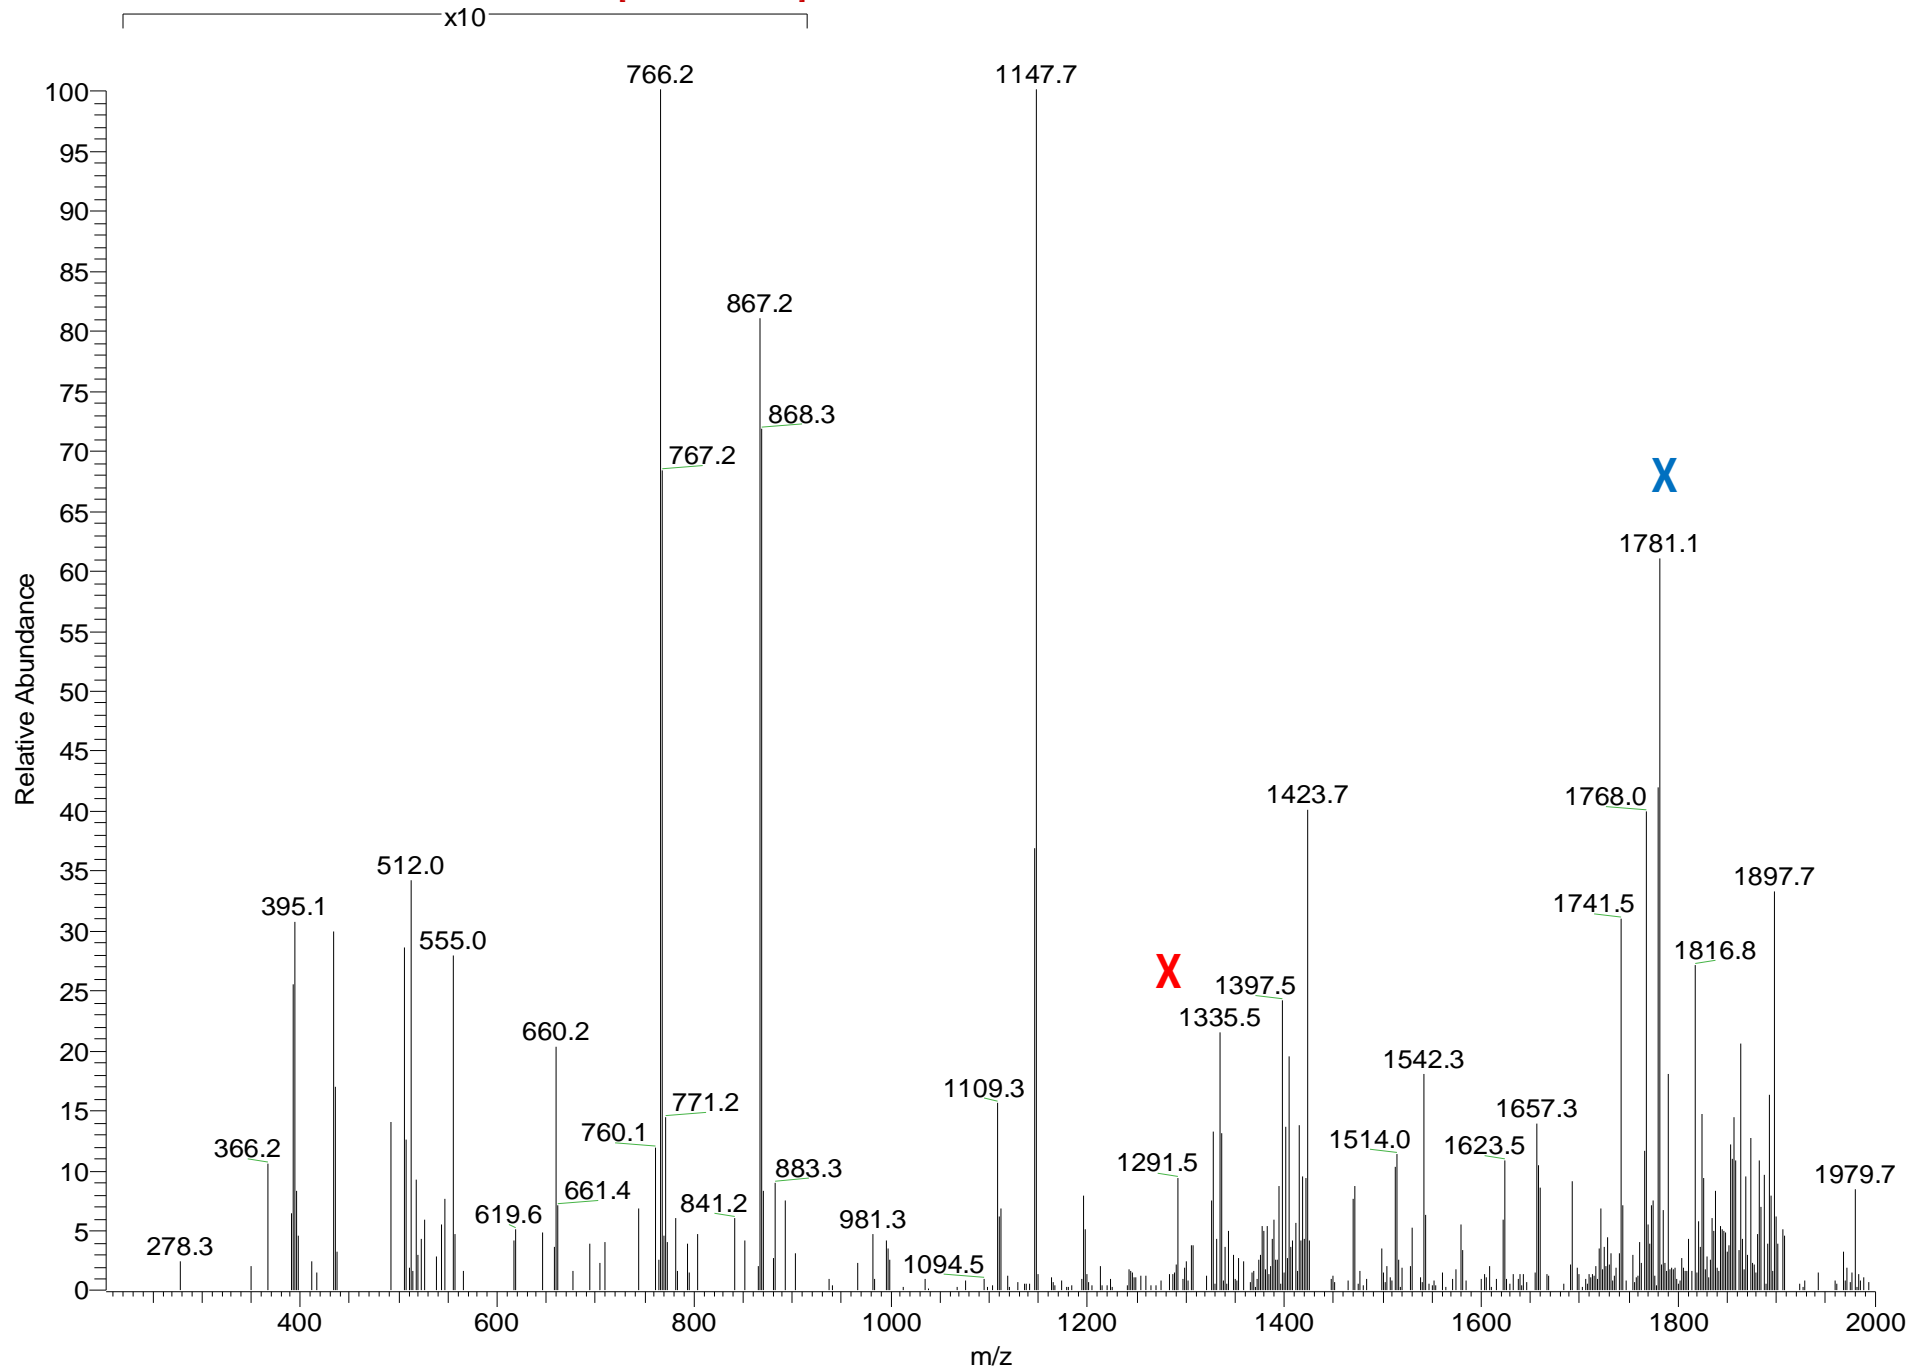

Supplement: NIHMS579158-supplement-1.pdf [file NIHMS579158-supplement-1.pdf]
