# Supplementary material
Source: PubMed Central journal article supplement (PMC4036456)
Supplement: NIHMS579158-supplement-2.pdf [file NIHMS579158-supplement-2.pdf]

**Article title: Glycan side-reaction may compromise ETD-based glycopeptide identification**

**Journal name:** Journal of The American Society for Mass Spectrometry

**Authors:** Zsuzsanna Darula and Katalin F. Medzihradszky

**Corresponding author:** Zsuzsanna Darula

Laboratory of Proteomics Research; Institute of Biochemistry, Biological Research Centre

62 Temesvari krt. Szeged, Hungary H-6726;

[darula.zsuzsanna@brc.mta.hu](mailto:darula.zsuzsanna@brc.mta.hu)

# **Tris-modified N-glycopeptides in human serum dataset**

130809\_3 #9113-9240 RT: 49.40-49.90 AV: 3 NL: 1.55E4  
F: FTMS + c NSI d Full ms2 1248.53@hcd35.00 [100.00-2000.00]

**m/z 1247.569 (4+):**  
**MVSHHN(2307.8)LTTGATLINEQWLLTAK,**  
**[179-202] of haptoglobin (Uniprot ID:P00738)**  
**2307.8: HexNAc4Hex5SASA(Tris)**

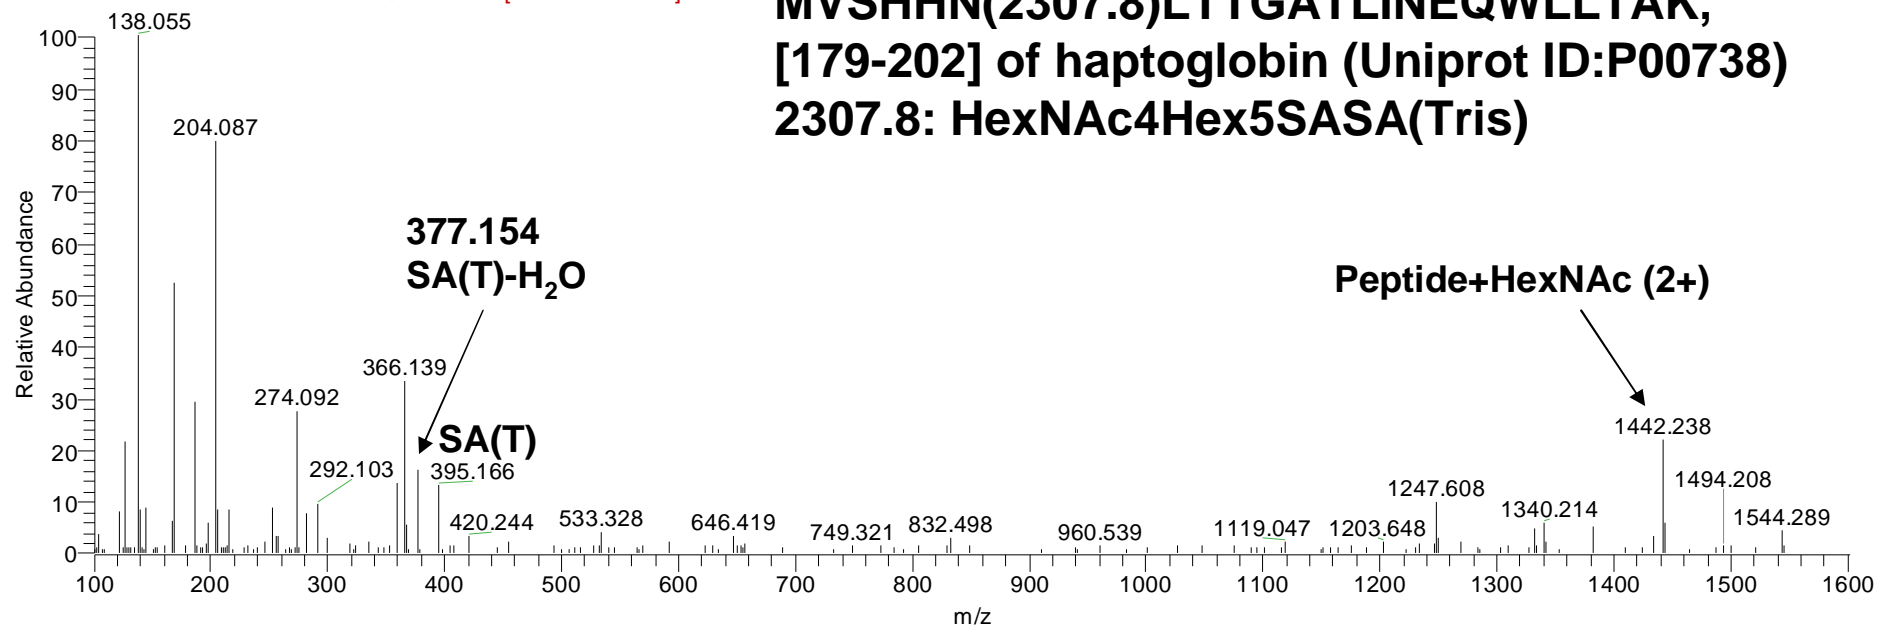

130809\_3 #9113-9240 RT: 49.41-49.91 AV: 3 NL: 3.13E4  
F: ITMS + c NSI d sa Full ms2 1248.53@etd50.00 [50.00-2000.00]

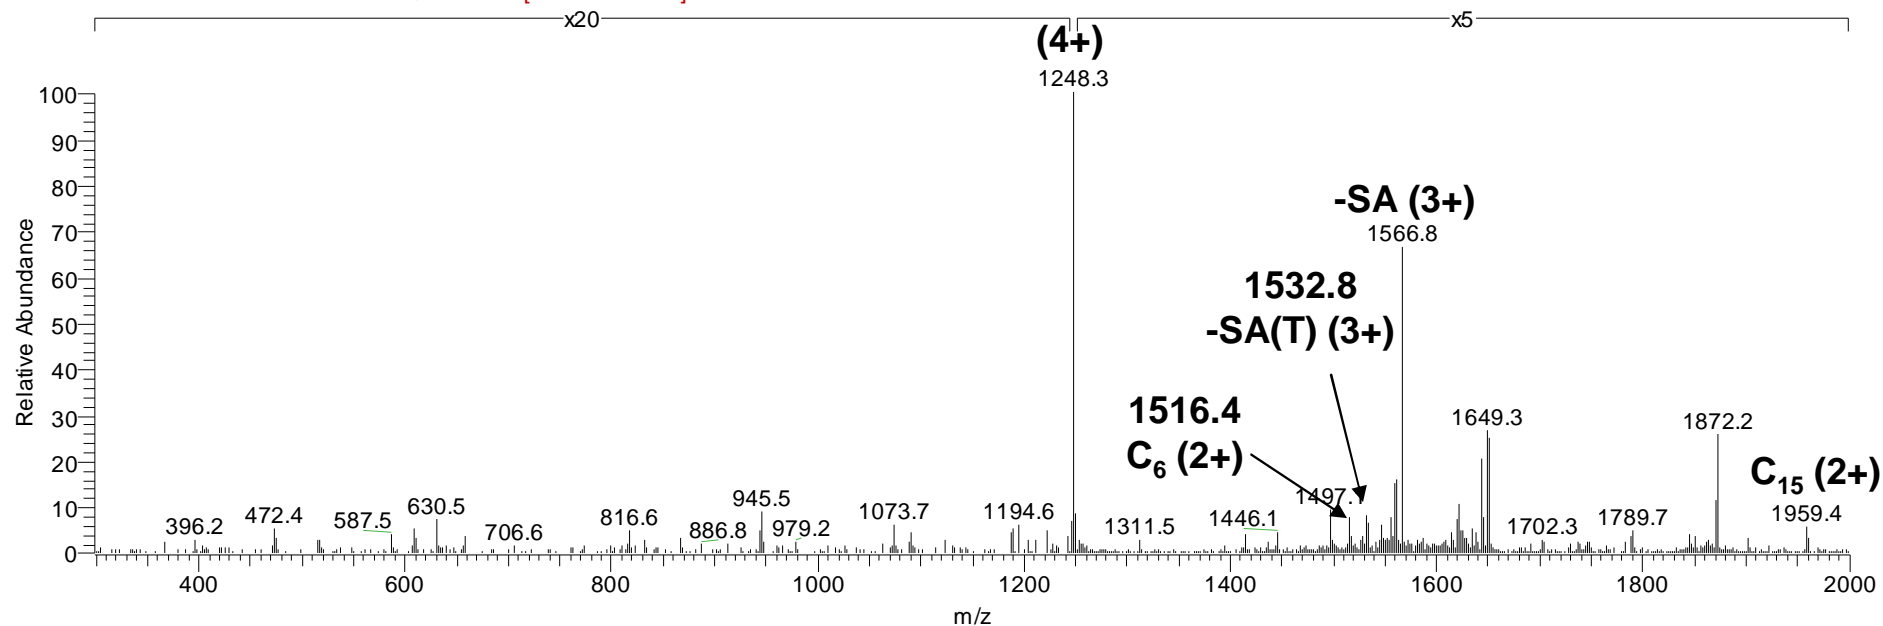

## ETD data of MVSHHN(2307.8)LTTGATLINEQWLLTAK

|                                                                                           |                                                                     |                  |                  |                                                              |                  |                                               |                  |                               |                                         |
|-------------------------------------------------------------------------------------------|---------------------------------------------------------------------|------------------|------------------|--------------------------------------------------------------|------------------|-----------------------------------------------|------------------|-------------------------------|-----------------------------------------|
| <b>304.2430</b>                                                                           | <b>387.3290</b>                                                     | <b>396.2820</b>  | <b>471.4050</b>  | <b>472.4050</b>                                              | <b>474.3410</b>  | <b>517.4600</b>                               | <b>587.4930</b>  | <b>608.5240</b>               | <b>609.5240</b>                         |
| $z+1_3(0.056)$<br>$c-1_5^{+2}(-0.40)$                                                     |                                                                     |                  | $c-1_4(0.18)$    | $c_4(0.17)$                                                  |                  | $z_5(0.15)$                                   |                  | $c-1_5(0.24)$<br>$c_5(-0.77)$ | $c_5(0.23)$                             |
| <b>630.4930</b>                                                                           | <b>646.6670</b>                                                     | <b>657.4030</b>  | <b>699.4340</b>  | <b>760.4200</b>                                              | <b>795.6720</b>  | <b>808.5080</b>                               | <b>816.5910</b>  | <b>832.6150</b>               | <b>844.5290</b>                         |
| $z_6(0.098)$                                                                              | $y_6(0.25)$                                                         |                  |                  |                                                              |                  |                                               | $z_7(0.12)$      | $y_7(0.12)$                   |                                         |
| <b>1250.6380</b>                                                                          | <b>1435.8350</b>                                                    | <b>1496.5640</b> | <b>1497.5690</b> | <b>1516.1820</b>                                             | <b>1531.7770</b> | <b>1532.7870</b>                              | <b>1558.8430</b> | <b>1559.8860</b>              | <b>1566.8310</b>                        |
|                                                                                           |                                                                     |                  |                  | $c-1_6^{+2}(0.086)$<br>$z+1_{13}(0.34)$<br>$c_6^{+2}(-0.42)$ |                  |                                               |                  |                               |                                         |
| <b>1615.1410</b>                                                                          | <b>1620.5090</b>                                                    | <b>1628.6030</b> | <b>1638.2150</b> | <b>1642.7840</b>                                             | <b>1650.2870</b> | <b>1788.7970</b>                              | <b>1870.2160</b> | <b>1871.2070</b>              | <b>1959.3500</b>                        |
| $b_8^{+2}(-0.012)$<br>$z+1_{23}^{+3}(0.40)$<br>$b_{23}^{+3}(0.42)$<br>$z_{23}^{+3}(0.74)$ | $c_{23}^{+3}(0.11)$<br>$c-1_{23}^{+3}(0.45)$<br>$y_{23}^{+3}(0.77)$ |                  |                  | $z_{15}(-0.11)$                                              |                  | $c_{12}^{+2}(0.054)$<br>$c-1_{12}^{+2}(0.56)$ |                  |                               | $z+1_{18}(0.27)$<br>$c_{15}^{+2}(0.50)$ |

130809\_3 #4030 RT: 25.58 AV: 1 NL: 6.85E3  
T: FTMS + c NSI d Full ms2 1053.65@hcd35.00 [100.00-2000.00]

**m/z: 1053.449 (5+)**  
**SRYPHKPEINS(2307.8)TTHPGADLQENFCR,**  
**[134-158] of prothrombin (Uniprot ID:P00734)**  
**2307.8: HexNAc4Hex5SASA(Tris)**

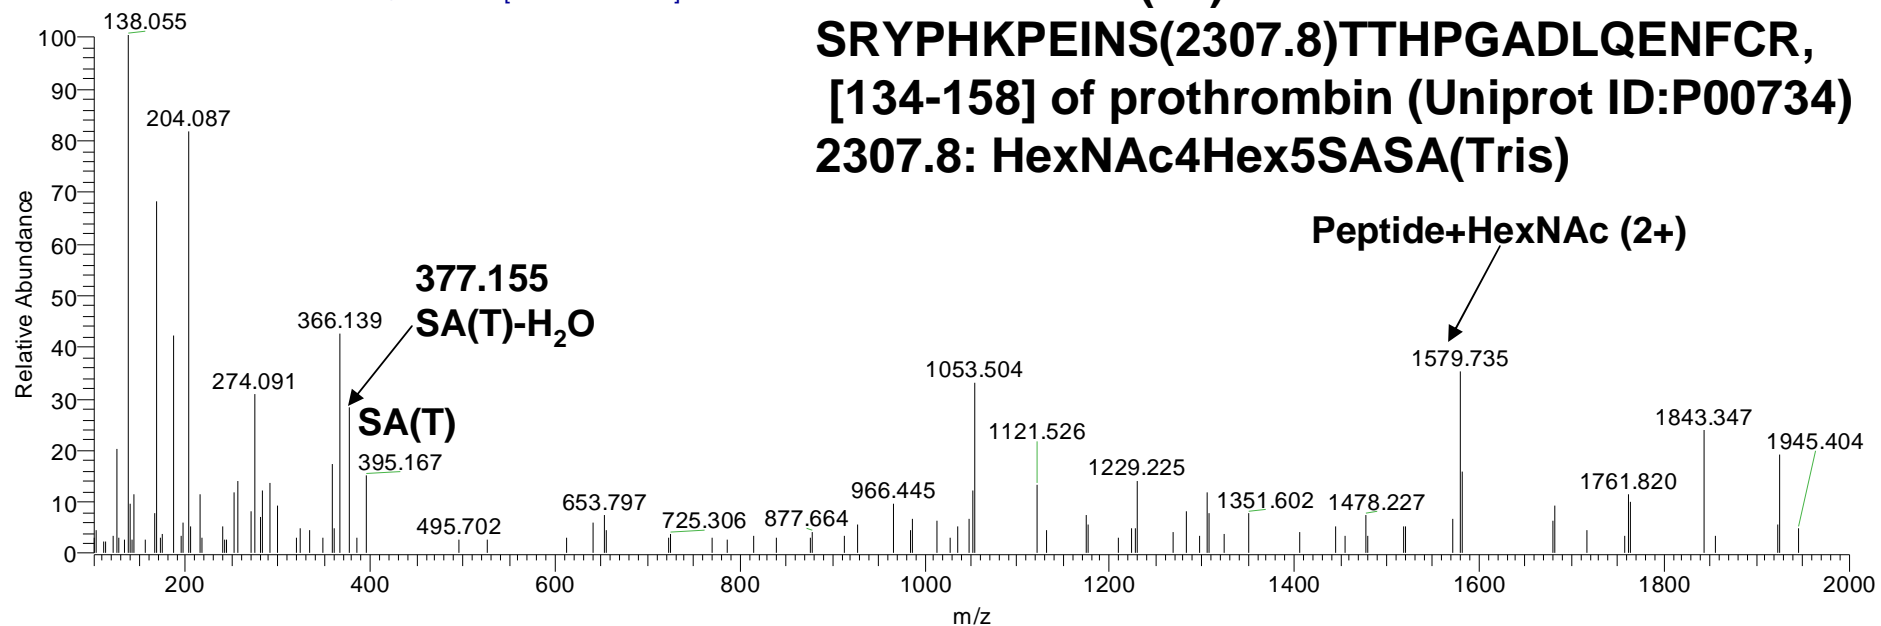

130809\_3 #4031 RT: 25.59 AV: 1 NL: 2.99E4  
T: ITMS + c NSI d sa Full ms2 1053.65@etd40.00 [50.00-2000.00]

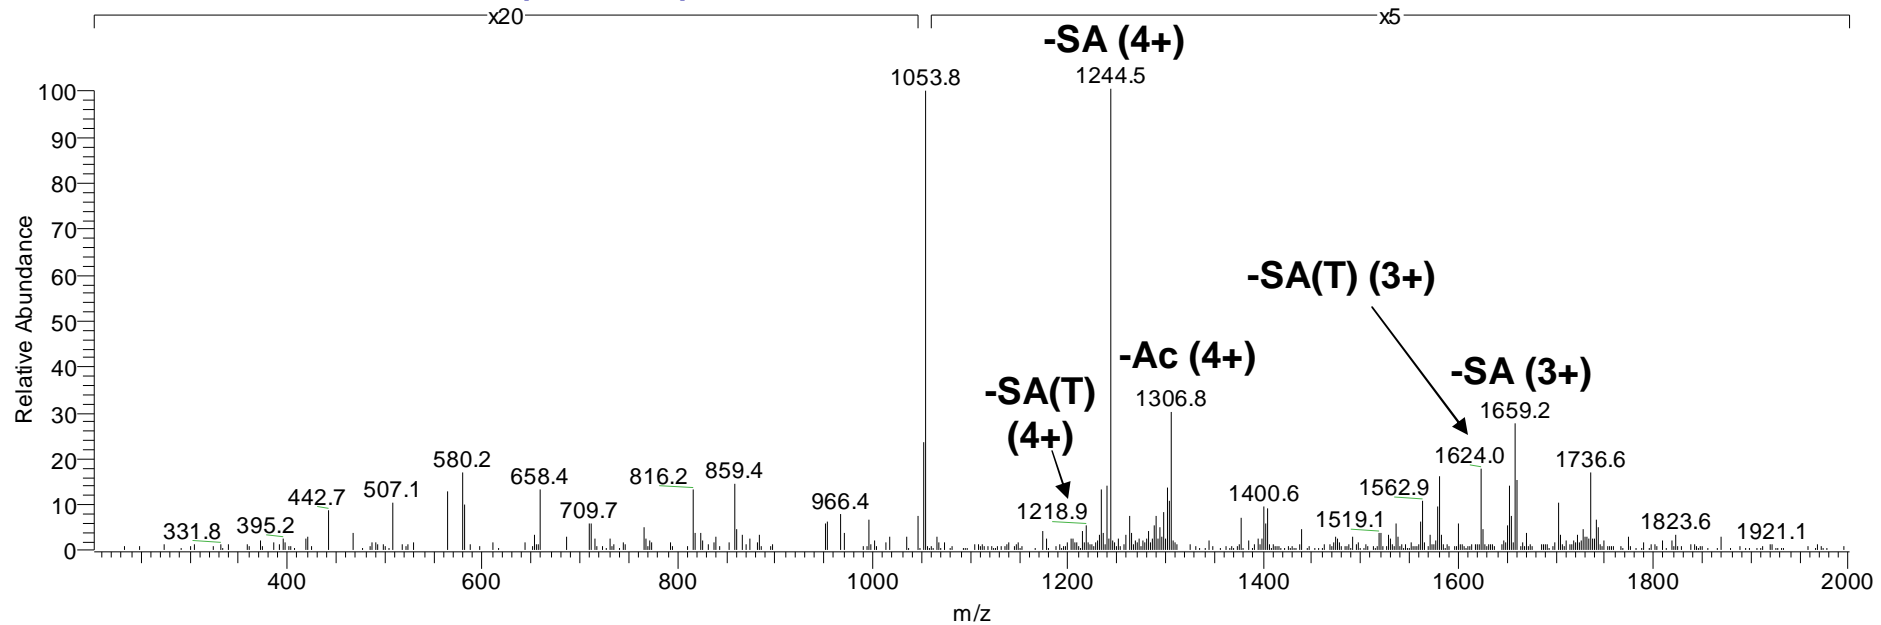

## ETD data of SRYPHKPEINS(2307.8)TTHPGADLQENFCR

|                     |                                               |                      |                                                 |                       |                                              |                                              |                                                |                                               |                                               |
|---------------------|-----------------------------------------------|----------------------|-------------------------------------------------|-----------------------|----------------------------------------------|----------------------------------------------|------------------------------------------------|-----------------------------------------------|-----------------------------------------------|
| 395.1790            | 419.3190                                      | 442.6510             | 466.4960                                        | 507.0820              | 563.6270                                     | 580.2380                                     | 653.6110                                       | 658.4440                                      | 686.7630                                      |
|                     |                                               | $c_7^{+2}(0.40)$     | $z_3(0.30)$<br>$z+1_3(-0.71)$                   | $c_8^{+2}(0.31)$      | $c_9^{+2}(0.32)$                             | $z_4(-0.0042)$                               |                                                | $c_5(0.10)$                                   |                                               |
| 708.8650            | 714.4460                                      | 730.4470             | 764.8070                                        | 816.1750              | 823.5530                                     | 838.6710                                     | 859.3500                                       | 867.0150                                      | 873.2440                                      |
| $z_5(-0.42)$        | $z_{12}^{+2}(0.13)$<br>$z+1_{12}^{+2}(-0.37)$ |                      | $z_{13}^{+2}(-0.033)$<br>$z+1_{13}^{+2}(-0.54)$ | $z+1_{14}^{+2}(0.31)$ | $y_{14}^{+2}(0.18)$                          | $z+1_6(0.32)$                                | $z+1_{15}^{+2}(-0.034)$<br>$z_{15}^{+2}(0.47)$ | $y_{15}^{+2}(0.13)$<br>$b_7(0.55)$            |                                               |
| 1218.8840           | 1233.6470                                     | 1240.0200            | 1243.7870                                       | 1244.4690             | 1263.5280                                    | 1377.1770                                    | 1400.6320                                      | 1536.4820                                     | 1562.2220                                     |
|                     | $b_{23}^{+4}(0.62)$                           | $b_{12}^{+3}(-0.49)$ |                                                 |                       |                                              | $c_{16}^{+3}(0.26)$<br>$c-1_{16}^{+3}(0.60)$ | $c_{17}^{+3}(0.036)$<br>$c-1_{17}^{+3}(0.37)$  | $z+1_{20}^{+3}(-0.15)$<br>$z_{20}^{+3}(0.18)$ | $c_{21}^{+3}(-0.11)$<br>$c-1_{21}^{+3}(0.22)$ |
| 1562.9400           | 1579.0170                                     | 1579.9840            | 1600.8460                                       | 1624.0220             | 1649.7060                                    | 1653.1720                                    | 1658.3610                                      | 1659.1710                                     | 1703.2380                                     |
| $c_{21}^{+3}(0.61)$ |                                               |                      | $c_{22}^{+3}(0.50)$                             |                       | $c_{23}^{+3}(0.34)$<br>$c-1_{23}^{+3}(0.67)$ |                                              |                                                |                                               | $c_{24}^{+3}(0.52)$                           |
